1 *Wolbachia* action in the sperm produces developmentally deferred chromosome  
2 segregation defects during the *Drosophila* mid-blastula transition

3 Brandt Warecki\*<sup>1</sup>, Simon Titen\*<sup>1</sup>, Mohammad Alam<sup>1</sup>, Giovanni Vega<sup>1</sup>, Nassim Lemseffer<sup>1</sup>,  
4 Karen Hug<sup>1</sup>, William Sullivan<sup>1,2</sup>

5 \*these authors contributed equally to this work

6 <sup>1</sup>Department of Molecular, Cell, and Developmental Biology, University of California, Santa  
7 Cruz, Santa Cruz, California

8 <sup>2</sup>correspondence: [wtsulliv@ucsc.edu](mailto:wtsulliv@ucsc.edu)

9

10 **ABSTRACT**

11 *Wolbachia*, a vertically transmitted endosymbiont infecting many insects, spreads rapidly  
12 through uninfected populations by a mechanism known as Cytoplasmic Incompatibility (CI). In  
13 CI, embryos from crosses between *Wolbachia*-infected males and uninfected females fail to  
14 develop due to the immediate action of *Wolbachia*-produced factors in the first zygotic division.  
15 In contrast, viable progeny are produced when the female parent is infected. Here, we find ~1/3  
16 of embryos from CI crosses in *Drosophila simulans* develop normally beyond the first and  
17 subsequent pre-blastoderm divisions. Developing CI-derived embryos then exhibit  
18 chromosome segregation errors during the mid-blastula transition and gastrulation. Single  
19 embryo PCR and whole genome sequencing reveal a large percentage of the developed CI-  
20 derived embryos bypass the first division defect. Using fluorescence *in situ* hybridization, we  
21 find increased chromosome segregation errors in gastrulating CI-derived embryos that had  
22 avoided the first division defect. Thus, *Wolbachia* in the sperm induces independent immediate  
23 and developmentally deferred defects. Like the initial immediate defect, the delayed defect is  
24 rescued through crosses to infected females.

25

26 **KEYWORDS**

27 *Wolbachia*; Cytoplasmic Incompatibility; chromosome segregation; mid-blastula transition;  
28 nuclear fallout

29

30 **INTRODUCTION**

31 *Wolbachia* are a bacterial endosymbiont present in the majority of insect species (Weinert et al.,  
32 2015; Werren et al., 2008). While they reside in the germline of both sexes, they are vertically  
33 transmitted exclusively through the female germline to all the offspring (Kaur et al., 2021).  
34 Consequently, *Wolbachia* have evolved a number of strategies that provide a selective  
35 advantage to infected females. This includes male killing, conversion of males to fertile  
36 females, induction of parthenogenesis, and most commonly cytoplasmic incompatibility (CI)  
37 (Serbus et al., 2008). CI is a form of *Wolbachia*-induced conditional sterility. Matings between  
38 infected males and uninfected females result in dramatic reductions in egg hatch rates  
39 (Hoffmann et al., 1986). However, matings between infected males and infected females,  
40 known as the “rescue cross,” results in normal egg hatch rates. Additionally, infected females  
41 mated with uninfected males results in normal hatch rates. Thus, in a *Wolbachia*-infected  
42 population, infected females have an enormous selective advantage over uninfected females as  
43 infected females produce normal hatch rates independent of the infection status of the male  
44 (Turelli & Hoffmann, 1991). This phenomenon, as well as *Wolbachia*-induced male sterility, is  
45 currently being employed throughout the world as a strategy for combating pest insects and  
46 insect-borne human diseases (Jiggins, 2017; Moretti et al., 2018; Zheng et al., 2019).

47

48 Since the discovery of CI and rescue (Ghelelovitch, 1952; Yen & Barr, 1971), there have been a  
49 number of insights into their molecular and cellular bases (Shropshire et al., 2020). Cytological  
50 studies demonstrate failures in condensation, alignment, and segregation of the paternal

51 chromosomes during the first zygotic division in embryos derived from the CI cross (Breeuwer &  
52 Werren, 1990; Callaini et al., 1997; Lassy & Karr, 1996; Reed & Werren, 1995; Ryan & Saul,  
53 1968; Tram et al., 2006; Tram & Sullivan, 2002). Subsequent studies demonstrated defects in  
54 the protamine-to-histone transition: deposition of the maternally-supplied histone H3.3 is  
55 significantly delayed (Landmann et al., 2009). In addition, the male, but not the female,  
56 pronucleus of CI-derived embryos exhibits delays in DNA replication, nuclear envelope  
57 breakdown, and Cdk1 activation (Tram & Sullivan, 2002). As a result, passage of the male  
58 pronucleus through mitosis is delayed relative to the female pronucleus. Molecular insight into  
59 the mechanism of CI has come from recent studies demonstrating that a pair of *Wolbachia*  
60 genes originating from integrated viral DNA, the CI factors or Cifs, is likely responsible for CI  
61 (Beckmann et al., 2017; LePage et al., 2017). One of these genes, *cidB*, encodes a  
62 deubiquitylating enzyme and the other, *cinB*, a nuclease (Chen et al., 2020). When the gene  
63 pair is expressed in the male germline, paternal chromosome and embryo abnormalities  
64 strikingly similar to *Wolbachia*-mediated CI are observed (Beckmann et al., 2017; LePage et al.,  
65 2017).

66  
67 In addition to the well-characterized first division mitotic defects, studies in a number of species  
68 demonstrate that CI produces additional developmental defects and lethal phases later in  
69 embryogenesis (Bonneau et al., 2018; Callaini et al., 1997; Callaini et al., 1996; Duron & Weill,  
70 2006; Jost, 1970; Lassy & Karr, 1996; Wright & Barr, 1981). Studies in wasps in which fertilized  
71 eggs develop into diploid females and unfertilized eggs develop into haploid males, provide  
72 insight into the different developmental outcomes in CI crosses (Tram et al., 2006). If CI  
73 disrupts but does not prevent paternal chromosome segregation, the resulting aneuploid  
74 embryos fail to develop. In contrast, if CI results in the complete failure of paternal chromosome  
75 segregation, embryos develop into haploid males bearing only the maternal chromosome  
76 complement (Ryan & Saul, 1968; Tram et al., 2006). In diplo-diploid organisms (where haploid  
77 embryos do not develop to adulthood), complete failure of paternal chromosome segregation in  
78 the first division leads to haploid embryos that develop and then subsequently fail to hatch  
79 (Bonneau et al., 2018; Callaini et al., 1997; Callaini et al., 1996; Duron & Weill, 2006; Jost,  
80 1970). Additionally, in some organisms such as *Drosophila simulans*, a small fraction of CI-  
81 derived embryos do not undergo any first division defect and consequently hatch as diploids  
82 (Lassy & Karr, 1996).

83  
84 In conjunction with broad developmental abnormalities, embryos developing from CI crosses  
85 also experience various cellular defects (Callaini et al., 1996). For example, studies in  
86 *Drosophila* have observed chromosome bridging in CI-derived embryos developing through the  
87 pre-blastoderm divisions (nuclear cycles 2-9) (Lassy & Karr, 1996; LePage et al., 2017).  
88 Additionally, irregular spindles are observed in syncytial and cellularized blastoderms (nuclear  
89 cycles 10-14) from CI crosses (Callaini et al., 1996). Other defects in developed embryos from  
90 CI-crosses include displaced nuclei, clumped chromatin, and disorganized centrosomes in  
91 blastoderms and abnormally condensed nuclei in gastrulating embryos (Callaini et al., 1996).  
92 Whether these cellular defects in later stage embryos are the direct result of aneuploidy from  
93 first division errors or due to a second, independent set of CI-induced defects is unresolved.

94  
95 Here, through a combination of live and fixed analysis, we directly address whether late  
96 developmental and cellular defects observed in CI-derived embryos are an outcome of the well-  
97 characterized first division errors or caused by an independent, poorly understood, set of CI-  
98 induced cell cycle defects. Consistent with previous reports, we find that the majority of  
99 embryos derived from the CI cross arrest in the first division. About one-third of CI-derived  
100 embryos progress normally through the first zygotic and subsequent internal syncytial divisions.  
101 We find that ~40% of the CI-derived embryos that reach the blastoderm stage (>nuclear cycle

102 10) are diploid, having undergone a normal first division. While these embryos undergo normal  
103 pre-blastoderm divisions, they exhibit significantly increased chromosome segregation defects  
104 during the mid-blastula transition (MBT), cellularization, and gastrulation. Crosses to infected  
105 females (the rescue cross) reduce the frequencies of the induced division errors. Thus, CI  
106 produces distinct and independent early and late chromosome segregation defects. These  
107 results reveal that *Wolbachia* CI-induced defects in the sperm produce developmentally  
108 deferred chromosome segregation defects in the late blastoderm divisions. These findings  
109 provide insight into the mechanisms of CI.  
110

## 111 RESULTS

### 112 *Wolbachia*-induced CI produces a late embryonic lethality in addition to early embryonic lethality

113 We used a combination of fixed and live analyses to determine the timing of defects as CI-  
114 derived embryos progressed through the early blastoderm divisions, cellularization, gastrulation,  
115 and hatching. We compared four different crosses: 1) the wild-type cross (uninfected male x  
116 uninfected female), 2) the CI-inducing cross (infected male x uninfected female), 3) the rescue  
117 cross (infected male x infected female), and 4) the reciprocal cross (uninfected male x infected  
118 female) (Figure 1A). Unless otherwise noted, we performed all experiments with *D. simulans*  
119 stocks that shared the same genetic background and were infected or uninfected with  
120 *Wolbachia* (*wRiv*) (see Materials and Methods). We used *D. simulans* because CI is particularly  
121 pronounced in this species.  
122

123 To determine the timing of CI-induced embryonic lethal phases, we collected embryos from all  
124 four crosses and compared egg hatch rates to the percentage of embryos that had developed to  
125 at least nuclear cycle 10 (the syncytial blastoderm stage) (Figure 1A-A'). Consistent with  
126 previous results (Hoffmann et al., 1986), we observed a severe decrease in hatching for  
127 embryos derived from CI crosses (CI=2%; N=2397, compare to wild-type=92%, N=1208;  
128 rescue=88%, N=1281; reciprocal=91%, N=1299) (Figure 1B-B'). Thus, both CI-induced  
129 embryonic lethality and its corresponding rescue by maternally supplied *Wolbachia* are robust in  
130 *D. simulans*. Our analysis of fixed embryos revealed that the percentage of embryos that had  
131 developed to nuclear cycle 10 derived from wild-type (97%, N=117), rescue (87%, N=66), and  
132 reciprocal (100%, N=47) crosses matched their respective hatch rates. However, unique to the  
133 CI cross, the percentage of CI-derived embryos that had developed to nuclear cycle 10 (28%,  
134 N=159) was significantly higher than its hatch rate (2%,  $p=2 \times 10^{-16}$  by  $\chi$ -square test) (Figure 1B-  
135 B'). Therefore, a second lethal phase occurs at or after cortical nuclear cycle 10 that results in a  
136 significant proportion of the reduced egg hatch in CI-derived embryos.  
137

138 To reduce any biological and environmental factors that could influence CI strength and  
139 embryonic development, we collected embryos from the same wild-type and CI crosses within  
140 1h of each other (Figure 1C). We then analyzed the egg hatch rate with one set of embryos  
141 while fixing and DAPI-staining the other set to determine developmental stage. As before, the  
142 percentages of embryos that had developed to nuclear cycle 10 (96%, N=188) and hatched  
143 (94%, N=521) were similar in wild-type crosses ( $p=0.4$  by two-sided paired t-test) (Figure 1D-  
144 D'). In contrast, in CI crosses, the percentages of embryos that had developed to nuclear cycle  
145 10 (32%, N=126) were significantly higher than the percentages of embryos that hatched (9%,  
146 N=471) ( $p=0.007$  by two-sided paired-t test) (Figure 1D-D').  
147

148 As an independent means of determining the lethal phases of embryos derived from the CI  
149 cross, we performed live analysis to compare the proportion of pre-blastoderm (nuclear cycles  
150 2-9), syncytial blastoderm (nuclear cycles 10-13), or cellular blastoderm (nuclear cycles 14) in  
151 CI and wild-type crosses (Figure S1A-A'). Wild-type embryos developed to the syncytial  
152 blastoderm stage 91% (N=40) of the time and hatched at a rate of 92% (N=58). However, CI-

153 derived embryos developed to the syncytial blastoderm stage 38% (N=147) of the time but  
154 hatched at a significantly reduced rate of 16% (N=110,  $p=2 \times 10^{-4}$  by  $\chi$ -square test) (Figure S1B-  
155 B').

156  
157 Therefore, consistent with previous results (Bonneau et al., 2018; Callaini et al., 1997; Callaini  
158 et al., 1996; Duron & Weill, 2006), these data suggest at least two distinct lethal stages are  
159 associated with CI: the well-described lethal phase immediately following fertilization (~70% of  
160 embryos), and a second lethal phase that occurs well after the nuclei have undergone many  
161 rounds of syncytial and cellular mitoses (~30% of embryos). Significantly, rescue acts on both  
162 phases.

163  
164 Late-stage CI embryos initially develop normally through pre-blastoderm syncytial divisions  
165 before exhibiting defects during blastulation

166 CI induces defective paternal chromosome segregation during the first embryonic division,  
167 which can result in either complete or partial loss of paternal chromosomes (Bonneau et al.,  
168 2018; Landmann et al., 2009; Tram et al., 2006). One of the possible consequences of  
169 improper paternal chromosome segregation in the first division is daughter nuclei that inherit  
170 only part of the paternal chromosomes. This resulting segmental aneuploidy may then carry  
171 over into the subsequent mitoses (Lassy & Karr, 1996; LePage et al., 2017). Certainly,  
172 persistent DNA damage carried by the paternal chromatin could affect repeated syncytial  
173 divisions in the form of breakage-fusion-bridge cycles (McClintock, 1941; Titen & Golic, 2008).

174  
175 Therefore, to assess any contribution of the first division segregation errors to the late-stage CI-  
176 induced lethality, we examined fixed and DAPI-stained embryos in all stages of early embryonic  
177 development (nuclear cycle 2-14) (Figure 2A). For embryos fixed during nuclear cycles 2-9, we  
178 scored for anaphase bridging, unequally-sized telophase daughter nuclei, and disorganized  
179 distributions of syncytial nuclei. For embryos fixed in cycles 10-14, we additionally scored for  
180 nuclear fallout, a process in which the products of defective divisions recede below the normal  
181 cortical monolayer of nuclei (Sullivan et al., 1990). As expected, wild-type-derived embryos  
182 exhibited abnormalities in 0% (0/64) of syncytial pre-blastoderm divisions (cycles 2-9), 0%  
183 (0/13) of early cortical divisions (cycles 10-11), and 2% (1/58) of late cortical divisions (cycles  
184 12-14) (Figure 2B). Similarly, CI-derived embryos exhibited abnormalities in only 3% (2/63) of  
185 syncytial pre-blastoderm divisions (cycles 2-9). However, we observed a significant increase in  
186 CI-derived embryos with abnormal nuclei during early cortical divisions (cycles 10-11, 24%,  
187 26/108) and late cortical divisions (cycles 12-14, 38%, 72/190) ( $p=1.1 \times 10^{-5}$  by two-sided Fisher's  
188 exact test) (Figure 2B). We regularly observed nuclear fallout (55%; Figure 2A, yellow arrows),  
189 anaphase bridging (33%), and disorganized nuclei (11%) in CI-derived cycle 10-14 embryos  
190 (Figure 2C). Additionally, we found that the CI-induced increase in abnormal nuclear divisions  
191 during late cortical divisions (cycles 12-14) was dramatically, but not completely, reduced in the  
192 rescue cross (5%, 7/128) ( $p=2.8 \times 10^{-11}$  by two-sided Fisher's exact test) (Figure 2B).

193  
194 Thus, CI-derived embryos that bypass the first lethal phase develop normally through nuclear  
195 cycles 2-9 and then exhibit a dramatic increase in abnormal segregation and nuclear  
196 organization during the cortical nuclear cycles (10-14). The normal development through  
197 nuclear cycles 2-9 suggests that the cortical division defects observed in the CI-derived  
198 embryos are not a direct consequence of abnormal first divisions but may instead be separate  
199 CI-induced defects. Significantly, as with the first division CI-induced defects, CI-induced  
200 cortical defects are rescued when infected males are crossed to infected females.

201  
202 Blastoderm embryos from CI crosses have higher rates of nuclear fallout than embryos from  
203 wild-type or rescue crosses



204 To further explore the defects that arise in blastoderm CI embryos, we performed a more  
205 sensitive assay to score the number of abnormal cortical nuclei that recede into the interior of  
206 the embryo, known as nuclear fallout. Because the fidelity of cortical nuclear divisions is  
207 maintained by a mechanism that eliminates the products of abnormal divisions from the cortex  
208 (Sullivan et al., 1990), assaying nuclear fallout provides a quantitative measure of cortical  
209 division errors (Sullivan et al., 1993). This assay is sensitive due to the lack of gap phases in  
210 cortical divisions. Even in wild-type embryos, nuclear fallout is observed at a low level (Sullivan  
211 et al., 1993). Consequently, we used this assay to determine the effect of *Wolbachia*-induced  
212 CI on the cortical syncytial divisions.

213  
214 We regularly observed CI embryos with increased numbers of nuclei that had fallen from the  
215 cortical layer of nuclei into the subcortex (Figure 3A, magenta arrows). We quantified the  
216 amount of nuclear fallout per cycle 10-14 embryo from wild-type (1.3 +/- 2.4, N=85), CI (6.6 +/-  
217 6.4, N=34), rescue (1.7 +/- 3.8, N=60), and reciprocal (0.9 +/- 1.4, N=35) crosses (Figure 3B-B').  
218 The amount of nuclear fallout per embryo was significantly increased in CI embryos compared  
219 to wild-type embryos ( $p=4.5 \times 10^{-8}$  by Mann-Whitney test) and significantly reduced compared to  
220 rescue embryos ( $p=1.7 \times 10^{-6}$  by Mann-Whitney test). Given the increased nuclear density during  
221 the final blastoderm cycle, we observed a more pronounced increase in nuclear fallout in cycle  
222 14 CI embryos (CI=11.7, N=14; wild type=1.0, N=64) (Figure 3B').

223  
224 The above analyses excluded the extreme posterior region of the embryo. This is because in  
225 wild-type embryos, the extreme posterior region is composed of 8-10 cellularized pole cells that  
226 have migrated to the cortex ahead of the main contingent of dividing nuclei. These cells are the  
227 precursors to the germline (Illmensee & Mahowald, 1974). In general, cortical nuclei in this  
228 posterior region exhibit a higher rate of nuclear fallout compared to somatic nuclei in the rest of  
229 the embryo (Figure 3A, yellow arrows). Similar to nuclear fallout in the rest of the embryo,  
230 nuclear fallout in the posterior pole was dramatically higher in cycle 10-14 embryos from CI  
231 crosses compared to those from wild-type, rescue, and reciprocal crosses (Figure 3C-C').

232  
233 Previous work has shown that nuclear fallout occurs via detachment of the cortical nuclei from  
234 their centrosomes (Sullivan et al., 1993). To determine if the nuclear fallout in embryos from CI  
235 crosses is due to a similar detachment from centrosomes, we next fixed embryos from CI  
236 crosses and co-stained with DAPI and antibodies that recognize centrosomin, a key component  
237 of centrosomes (Megraw et al., 1999) (Figure 3D). Receding nuclei create a gap in the normally  
238 dividing cortical surface nuclei. The centrosomes associated with the fallen nuclei (green  
239 arrows) remained on the cortex (Figure 3D). Thus, nuclei in CI embryos regularly detach from  
240 their centrosomes and recede from the cortex.

241  
242 Lagging chromosomes are a proximal cause of nuclear fallout in CI-derived embryos

243 To determine the primary cause of the errors leading to nuclei falling out from the cortical  
244 monolayer of normally dividing nuclei, we injected early embryos with rhodamine-labeled  
245 histones and performed live imaging on a confocal microscope. Live analysis allowed us to  
246 identify receding nuclei and analyze the proximal mitotic defects that led to nuclear fallout. For  
247 both CI- and wild-type-derived embryos, we observed nuclear fallout occurred almost  
248 exclusively during the telophase-to-interphase transition (Figure 4A). This is likely the result of a  
249 failure of the nuclei maintain association with their centrosomes following errors in the preceding  
250 division.

251  
252 We routinely observed that nuclear fallout in telophase/interphase was immediately preceded by  
253 defective sister chromatid separation during anaphase (Figure 4B, Movie 1). While nuclei in  
254 which sister chromatids had segregated normally (Figure 4B, magenta circles) remained on the

255 surface and entered the next cell cycle, nuclei in which sister chromatids had severely lagged  
256 (Figure 4B, yellow and blue circles) immediately receded into the interior of the embryo during  
257 the subsequent interphase. In total, 70% of nuclei destined to fallout in CI-derived embryos  
258 were preceded by lagging or bridged chromosomes, as in wild-type-derived embryos (Figure  
259 4C).

260  
261 Defects causing segregation errors in nuclei destined to fallout may also result in the activation  
262 of the spindle assembly checkpoint that would have subsequently delayed entry into anaphase.  
263 Therefore, we compared the timing of the metaphase-to-anaphase transition in divisions that  
264 resulted in fallout to those of their neighboring normal divisions (Figure 4D). Only a small  
265 fraction of nuclei destined to fallout (22%) exhibited a delay in anaphase entry compared to their  
266 neighboring nuclei (“late”). In contrast, the vast majority entered anaphase synchronously with  
267 (74%, “on-time”) or preceding (4%, “early”) their neighbors. Interestingly, in wild-type embryos,  
268 a greater fraction (40%) of nuclei destined to fallout delayed metaphase exit. Therefore, we  
269 were unable to regularly detect spindle-assembly checkpoint-mediated delays in CI embryos at  
270 our level of temporal resolution.

271  
272 Segregation defects persist after cellularization in CI-derived embryos

273 Following completion of nuclear cycle 13, in an event known as cellularization, each syncytial  
274 nucleus is encompassed by an ingressing plasma membrane resulting in the simultaneous  
275 formation of individual cells (Sokac et al., 2022). After cellularization, gastrulation begins (Foe,  
276 1989). Invaginations form the head furrow, and bilateral groups of cells throughout the embryo,  
277 referred to as mitotic patches, undergo another round of mitosis. We reasoned that CI-induced  
278 segregation defects might persist in these mitoses following cellularization.

279  
280 To examine if chromosome segregation defects occur in CI-derived embryos after the  
281 establishment of individual cells, we fixed and DAPI-stained gastrulating embryos from wild-  
282 type, CI, and rescue crosses (Figure S2A) and quantified the frequency of division errors in  
283 each cross (Figure S2B-D’). While chromosome segregation defects in gastrulating embryos  
284 from wild-type crosses occurred at a low rate (11%, N=321 divisions/25 embryos), CI-derived  
285 embryos exhibited a significant increase in segregation defects (34%, N=687 divisions/40  
286 embryos) ( $p=7.7 \times 10^{-7}$  by Mann-Whitney test) (Figure S2D-D’). Significantly, we observed a  
287 reduction in segregation errors in embryos from the rescue cross (19%, N=485 divisions/30  
288 embryos) ( $p=8.6 \times 10^{-4}$  by Mann-Whitney test), although the level of segregation errors was still  
289 increased compared to that of wild-type embryos ( $p=0.009$  by Mann-Whitney test). Thus, CI-  
290 derived embryos exhibit increased chromosome segregation errors that begin in blastoderm  
291 stages and continue post-cellularization.

292  
293 CI-derived blastoderm embryos consist of both haploids strongly associated with embryonic  
294 lethality and diploids

295 Previous studies have linked late embryonic lethality to haploid development arising from CI-  
296 induced chromosome segregation defects during the first division (Bonneau et al., 2018; Callaini  
297 et al., 1997; Duron & Weill, 2006). Should CI be strong, paternal chromosomes are completely  
298 eliminated during the first division, and embryos develop bearing only the maternal chromosome  
299 complement (Tram et al., 2006). In diplo-diplo organisms, these haploid embryos then die  
300 before hatching (Bonneau et al., 2018; Callaini et al., 1997; Duron & Weill, 2006). Our  
301 observation of mitotic defects in CI-derived blastoderm and gastrulating embryos offers a  
302 potential additional explanation for late embryonic lethality. Therefore, we wished to reexamine  
303 the relationship between complete paternal chromosome exclusion resulting in haploidy and late  
304 embryonic lethality.

305

306 To assess the relationship between haploidy and lethality in CI-derived embryos, we performed  
307 CI and rescue crosses in which the *Wolbachia*-infected fathers transmitted an *egfp* transgene to  
308 all their offspring (Figure 5A). The resulting embryos from these crosses should be  
309 genotypically identical. We additionally performed wild-type crosses with uninfected fathers  
310 bearing no transgene, serving as a negative control (Figure 5A). We selected embryos that  
311 developed to the cellular blastoderm stage and performed single embryo PCR with primers  
312 complementary to the paternally-transmitted *egfp* transgene. The *egfp* transgene was always  
313 detected in embryos from the positive control rescue cross (~1.4kb band) and never detected in  
314 our negative control embryos derived from uninfected males lacking the *egfp* transgene (Figure  
315 5B). In contrast, we only detected the *egfp* transgene in 42% (N=91) of CI-derived cellular  
316 blastoderms (Figure 5B-C). This indicates that while many of the CI-derived blastoderm  
317 embryos are diploid, a significant proportion of late-stage CI embryos are haploid. We regularly  
318 observed that the overall percentage of *egfp*-positive, diploid embryos correlated with the  
319 percentage of hatched eggs from paired egg hatch assays (Figure 5C'), suggesting only the  
320 *egfp*-negative, haploid embryos were failing to hatch. Thus, as previously reported (Bonneau et  
321 al., 2018; Callaini et al., 1997; Duron & Weill, 2006), haploidy due to loss of paternal  
322 chromosomes is linked with late embryonic lethality.

323

#### 324 Late-stage defects are not due to chromosome fragmentation and mosaicism after the first 325 division

326 Although we found haploidy to be strongly associated with late embryonic lethality, haploidy  
327 does not inherently cause the type of chromosome segregation errors we regularly observed in  
328 late CI-derived embryos (Debec, 1978; Tang et al., 2017). An alternative potential cause for the  
329 segregation errors characterized here is segmental aneuploidy due to an incomplete exclusion  
330 of the paternal chromosomes during the first division that does not disrupt early embryonic  
331 development. In this scenario, partial chromosome loss or chromosome fragmentation is  
332 transmitted from the first division through seemingly normal syncytial divisions and then causes  
333 the segregation errors seen in later developmental stages.

334

335 To test the possibility that fragmented paternal chromosomes are transmitted through the  
336 syncytial divisions, we sequenced the entire genome of collected cellular blastoderms and then  
337 mapped read depth to specific coding regions spanning the length of each chromosome (Figure  
338 5D). As above, males in the CI and rescue crosses were homozygous for the *egfp* transgene,  
339 allowing us to distinguish between embryos in which paternally-derived chromosomes were  
340 either present or absent. We then compared read depth at each locus to the mean read depth  
341 across the entire genome for each embryo. These data suggest that neither haploid (*egfp*-  
342 negative) nor diploid (*egfp*-positive) CI-derived embryos exhibited whole or partial chromosome  
343 loss consistent with the mitotic transmission of only part of the paternal genome (Figure 5E, File  
344 S1). Instead, both haploid and diploid embryos had full euploid sets of chromosomes  
345 corresponding to either 1n or 2n respectively. This indicates that late-stage CI embryos had  
346 either 1) lost all their paternal chromosomes during the first division or 2) did not experience any  
347 first division defect at all. Thus, defects observed in late-stage CI embryos cannot be due to  
348 partial chromosome loss or fragmentation carried over from the first division.

349

350 A separate, potentially interesting, outcome of this experiment is that we found CI-derived  
351 embryos regularly had less depth of reads mapping to their entire genome than either wild-type  
352 or rescue embryos (Figure S3). This was true for both haploid and diploid CI embryos.  
353 Normalizing the depth of reads aligning to the whole genome to the depth of reads aligning to  
354 the mitochondrial genome (which should be unchanged) for each embryo suggested differences  
355 in sequencing input may not fully explain the decrease in reads mapping to CI embryos (Figure  
356 S3B). Although we cannot exclude how any variation in sequencing multiple samples may

357 affect these results, this finding raises the intriguing possibility of intrinsic differences in the  
358 chromatin of CI and wild-type-derived blastoderm embryos.

359

360 Late-stage mitotic errors in diploid CI-derived embryos are due to a second CI-induced defect  
361 separate from the first division defect

362 Given neither haploidy nor chromosome fragmentation arising from the first division defect  
363 explains the mitotic errors we observed in CI-derived blastoderms and gastrulating embryos, we  
364 hypothesized that there is instead a second, CI-induced defect completely separate from the  
365 first division defect. To test this hypothesis, we asked if CI embryos that had completely  
366 “escaped” the first division defect had increased mitotic errors during later developmental  
367 stages.

368

369 As described above, late-stage embryos are either haploid, missing their complete paternal  
370 chromosome complement, or diploid, having escaped any first division defect to develop with  
371 both maternal and paternal chromosome sets (Figure 5E). These diploid embryos can be  
372 identified by the presence of a paternally-derived chromosome, such as the Y chromosome,  
373 which is only detectable in diploids and never in haploids (Figure 5E). The *D. simulans* Y  
374 chromosome can be identified by fluorescence in situ hybridization with Y-specific probes  
375 (Ferree & Barbash, 2009). Therefore, we fixed gastrulating embryos from wild-type, CI, and  
376 rescue crosses, labelled the Y chromosome with fluorescent probes to select embryos that had  
377 escaped the first division defect, counterstained with DAPI to score any mitotic defects.

378

379 While Y-bearing gastrulating embryos from wild-type crosses (Figure 6A) exhibited relatively  
380 normal chromosome segregation, we observed lagging and bridging chromosomes in Y-bearing  
381 embryos from CI crosses (Figure 6B, white arrow). Additionally, in Y-bearing embryos from  
382 rescue crosses, chromosome segregation proceeded normally (Figure 6C). The increase in  
383 chromosome segregation errors in Y-bearing CI-derived embryos (15%, N=1095 divisions/23  
384 embryos) compared to Y-bearing wild-type embryos (7%, N=1418 divisions/40 embryos) was  
385 statistically significant ( $p=1.3 \times 10^{-5}$  by Mann-Whitney test) (Figure 6D-D'). As the diploid, Y-  
386 bearing embryos had completely escaped the first division defects, these results demonstrate  
387 that late-stage mitotic errors are due to a second CI-induced defect independent of the first  
388 division defect. The reduction of chromosome segregation errors in Y-bearing rescue-derived  
389 embryos (8%, N=510 divisions/18 embryos) compared to Y-bearing CI-derived embryos was  
390 also statistically significant ( $p=6.6 \times 10^{-4}$  by Mann-Whitney test) (Figure 6D-D'), indicating  
391 maternally supplied *Wolbachia* also rescue this second defect.

392

393 Although these CI-derived embryos are diploid and are likely to hatch despite the observed  
394 division defects, we found a subsequent decrease in the rate of hatched eggs that develop into  
395 adults in CI crosses compared to both wild-type and rescue crosses (Figure S4). Therefore,  
396 *Wolbachia* in the sperm may induce remarkably deferred CI defects that contribute to the  
397 selective advantage of infected females by promoting increased lethality during post-hatching  
398 development.

399

## 400 DISCUSSION

401 In addition to the well-characterized early embryonic arrest, a number of reports reveal a large  
402 portion of CI-derived embryos undergo substantial embryonic development but then fail to hatch  
403 (Bonneau et al., 2018; Callaini et al., 1997; Callaini et al., 1996; Duron & Weill, 2006). This is in  
404 part explained by the behavior of the paternal chromosomes during the first division. While  
405 weak CI results in defective paternal chromosome segregation creating aneuploid nuclei that  
406 arrest in early embryonic development, strong CI results in complete failure of sister  
407 chromosome segregation and haploid nuclei bearing only the maternal chromosome



408 complement (Bonneau et al., 2018; Callaini et al., 1997; Duron & Weill, 2006; Tram et al., 2006).  
409 Similar to diploid embryos that have “escaped” the first division defects, haploid embryos  
410 develop normally to cellular blastulation. However, haploids then fail prior to hatching. Here,  
411 we addressed whether defects observed in late CI embryos such as chromosome segregation  
412 errors and nuclear fallout are the result of first division errors or a second, distinct CI-induced  
413 defect. Specifically, we examined the timing, extent, and causes of defects produced in late *D.*  
414 *simulans* embryos derived from CI crosses.

415  
416 In accord with previous studies in *D. simulans* (Callaini et al., 1997; Callaini et al., 1996), we  
417 found that there is a second late embryonic lethality associated with CI-derived embryos:  
418 between one-fourth to one-third of embryos die after cellularization but before hatching (Figure  
419 1). In contrast to previous reports (Lassy & Karr, 1996), we found these embryos initially  
420 proceeded normally through nuclear cycles 2-9 (Figure 2). However, as the CI-derived embryos  
421 progressed through the cortical divisions (cycles 10-14), they begin to experience increasingly  
422 more severe defects. These late embryonic defects include lagging anaphase chromosomes  
423 and chromosome bridging, which directly result in nuclear fallout, and further chromosome  
424 bridging during gastrulation (Figures 3, S2). The normal progression of embryos through cycles  
425 2-9 suggests paternal chromosome segregation was not partially defective in the first division.  
426 This is because paternal chromosome bridging in the first division would produce aneuploid  
427 daughter nuclei bearing chromosome fragments lacking telomeres. The lack of telomeres  
428 would result in detectable breakage-fusion-bridge cycles and amplifications of the aneuploidy in  
429 subsequent divisions (McClintock, 1941; Titen & Golic, 2008), which we did not observe. Our  
430 sequencing analysis of cellularized embryos (Figure 5) confirms that late-stage CI embryos did  
431 not experience partial chromosome loss during the first division. Thus, the mitotic defects first  
432 observed in cortical syncytial divisions are unlikely a consequence of CI-induced segmental  
433 aneuploidy following the first nuclear cycle.

434  
435 Consequently, our single embryo PCR and whole genome sequencing of cellularized  
436 blastoderms containing a paternally-derived *egfp* transgene revealed late-stage CI embryos  
437 were either haploid or diploid (Figure 5). The percentage of diploid embryos closely  
438 corresponded to the percentage of embryos hatched, suggesting late embryonic lethality is  
439 associated with CI-induced haploidy in *D. simulans*, as previously reported (Callaini et al.,  
440 1997). Importantly, this experiment also demonstrated that the detection of paternally-derived  
441 chromosomes in that late-stage CI embryos could be used to distinguish between embryos that  
442 had experienced first division defects (haploid=only maternal chromosomes, no paternal  
443 chromosomes) and embryos that had not experienced any first division defects (diploid=both  
444 maternal and paternal chromosomes). As discussed below, this allowed us to uncouple CI-  
445 induced late embryo defects from first division defects.

446  
447 In spite of the strong association between haploidy and lethality, first division-induced haploidy  
448 in and of itself cannot explain the defects we observed in CI-derived blastoderm and  
449 gastrulating embryos. This is because 1) haploidy is not intrinsically harmful to mitotic divisions  
450 in *Drosophila*. For example, in some *Drosophila* mutations that induce haploidy, chromosome  
451 segregation occurs normally during cortical divisions (Tang et al., 2017). Additionally, meiosis  
452 II—essentially a mitotic division of a haploid nucleus—is highly accurate by necessity.  
453 Furthermore, 2) any downstream effects of haploidy—such as changes to zygotic gene copy  
454 number or loss of zygotic heterozygosity—cannot explain defects first detected in syncytial  
455 cortical divisions (cycles 10-13), which do not require zygotic transcription (Yuan et al., 2016).  
456 In contrast, the observed defects in CI-derived late embryos are more likely due to a second, CI-  
457 induced defect.

458

459 In support of this hypothesis, our observation of increased chromosome segregation errors in  
460 diploid CI gastrulating embryos bearing paternally-derived Y chromosomes establishes that the  
461 defects observed in late-stage CI embryos are not limited to haploids (Figure 6). Instead,  
462 defects are present in diploid late-stage embryos. Significantly, as discussed above for the  
463 paternally-derived *egfp* transgene, detection of the Y chromosome by FISH allowed us to select  
464 late-stage diploid embryos that had “escaped” first division defects and instead continued  
465 development with both paternal and maternal chromosome complements. Therefore, the  
466 significant increase in mitotic errors observed in diploid CI-derived embryos relative to wild-type-  
467 derived embryos demonstrates the existence of a second, CI-induced defect, completely  
468 separate from the first division defect (Figure 7A-B). Significantly, maternally-supplied  
469 *Wolbachia* independently rescues this defect as well (Figure 7C).

470  
471 Interestingly, we also observed several non-Y-bearing gastrulating embryos from CI crosses  
472 that had extensive chromosome segregation errors beyond what we had observed for the  
473 diploid Y-bearing gastrulating embryos (Figure S5A-C). Non-Y-bearing embryos may either be  
474 diploid (XX) or haploid (XØ). If these embryos were haploid, this observation would suggest  
475 that CI could affect both the maternal chromosomes and paternal chromosomes.

476  
477 One intriguing aspect of the second CI-induced defect is that the embryos progress normally  
478 through the early mitotic cycles and then begin to exhibit mitotic defects in the blastoderm stage.  
479 The explanation is likely a consequence of the dramatic structural and regulator cell cycle  
480 modifications that occur when the dividing nuclei arrive at the cortex (Farrell & O’Farrell, 2014).  
481 These include heterochromatin formation, initiation of late origins of replication, slowing of DNA  
482 replication, activation of zygotic transcription, and metaphase furrow formation (Farrell &  
483 O’Farrell, 2014; Li et al., 2014; Riggs et al., 2003; Seller et al., 2019; Seller & O’Farrell, 2018).  
484 The phenotype of numerous maternal-effect mutations that either rely on or disrupt these  
485 processes is strikingly similar to the defects observed in CI embryos: normal early pre-cortical  
486 divisions followed by extensive mitotic errors and nuclear fallout during the cortical blastoderm  
487 divisions (Sullivan & Theurkauf, 1995). For example, because of the slowing of DNA replication  
488 during the cortical divisions, activation of the S-phase checkpoint is specifically required during  
489 this stage. Maternal-effect mutants that disrupt this checkpoint progress normally through the  
490 early divisions but exhibit anaphase bridging and nuclear fallout during the late cortical  
491 blastoderm divisions as a result of entering metaphase with incompletely replicated  
492 chromosomes (Fogarty et al., 1997; Fogarty et al., 1994). Given the similarity of this phenotype,  
493 both in timing and chromosome dynamics, CI-induced late division defects may be due to  
494 improper chromosome replication. Additionally, defects in other events specific to the cortical  
495 blastoderm cycles, may also contribute directly or indirectly to CI-induced defects. For example,  
496 studies of hybrid incompatibilities between *D. simulans* and *D. melanogaster* show that  
497 heterochromatin establishment may be particularly sensitive, and its disruption can result in  
498 defects strikingly similar to the late CI defects (Ferree & Barbash, 2009). Other important  
499 processes, such as those involved in DNA integrity, protein turnover, and cell cycle timing, may  
500 be also involved (Momtaz et al., 2020).

501  
502 In considering the mechanism by which paternal *Wolbachia* may induce these defects, the  
503 observation that CI-derived blastoderm embryos progress normally through pre-cortical  
504 divisions must be noted. One potential explanation is that the chromosomes in CI-derived  
505 embryos could be epigenetically marked by *Wolbachia* in the paternal germline. This mark  
506 would then persist through the pre-cortical divisions and become disruptive during blastoderm  
507 divisions. Interestingly, *Wolbachia* infection results in altered DNA methylation levels in certain  
508 wasps, mosquitos, and *Drosophila* (LePage et al., 2014; Wu et al., 2020; Ye et al., 2013).  
509 Should *Wolbachia* in the male germline similarly change the low naturally occurring methylation

510 levels in *D. simulans* (Deshmukh et al., 2018), the altered mark may become disruptive in  
511 blastoderm divisions, potentially by distorting heterochromatin establishment. However, DNA  
512 methylation does not appear to contribute to CI levels (LePage et al., 2014).

513  
514 An alternative explanation for the specificity of the late blastoderm defects comes from studies  
515 into hybrid dysgenesis in *D. melanogaster* in which unregulated mobilization of transposable  
516 elements results in a spectrum of genetic and developmental defects in the germlines of  
517 dysgenic progeny (Kidwell et al., 1977). Transposition in progeny can be suppressed when  
518 maternally-supplied small RNAs mediate silencing of the transposable element (Czech &  
519 Hannon, 2016). This silencing is associated with increased H3K9 methylation, increased  
520 heterochromatin levels, and altered splicing (Le Thomas et al., 2013; Sienski et al., 2012;  
521 Teixeira et al., 2017). Given small RNAs can affect chromosomes in *trans* (Hermant et al.,  
522 2015), CI may induce a similar small RNA pathway that could epigenetically alter both paternal  
523 and maternal chromosomes prior to the first division. As the blastoderm divisions do not require  
524 zygotic transcription (Yuan et al., 2016), it is unlikely an epigenetic alteration, if occurring, would  
525 cause defects via disrupted transcription. Instead, as discussed above, an epigenetic change  
526 may disrupt key aspects of the mid-blastula transition, which in turn could result in the observed  
527 errors.

528  
529 Insight into the molecular mechanism of CI came with the discovery of the *Wolbachia*-encoded  
530 Cifs that play a key role in CI and rescue (Beckmann et al., 2017; LePage et al., 2017). A  
531 combination of molecular, genetic, and biochemical studies provided compelling evidence that  
532 the *Wolbachia* encoded genes, *CidB* and *CidA*, act as a paternally supplied toxin and maternally  
533 supplied anti-toxin respectively (Beckmann et al., 2017; Horard et al., 2022; Wang et al., 2022).  
534 However, a toxin/anti-toxin model for CI does not easily explain the cortical blastoderm defects  
535 occurring after many rounds of normal mitotic cycles. This is because a paternally-supplied  
536 toxin is expected to be diluted with every round of division, and therefore its induced-defects  
537 would decrease over time. Similarly, a second set of CI/rescue elements, *CinA* and *CinB*, is  
538 also proposed to act in a toxin/anti-toxin manner (Chen et al., 2019; Sun et al., 2022). An  
539 alternative possibility is that Cifs may epigenetically modify paternal and maternal chromosomes  
540 to mediate CI and rescue (Kaur et al., 2022).

541  
542 How and if these proteins also contribute to CI-induced late-embryo defects remains to be  
543 determined. Our observation of chromosome segregation errors in diploid embryos that have  
544 progressed normally through the first division (and thus should have minimal Cif activity)  
545 suggests an additional set of *Wolbachia* genes may induce late-embryo defects. Additionally,  
546 unlike the Cif-mediated first division errors, CI-induced mitotic defects in late embryos do not  
547 appear to result from abnormal condensation, alignment, or timing of metaphase exit (Figure 4),  
548 suggesting a separate proximate cause. Instead, the observed chromosome bridging is  
549 strikingly similar to embryos exposed to the DNA replication inhibitor aphidicolin (Farrell et al.,  
550 2012), suggesting CI-derived blastoderm embryos may be entering anaphase with incompletely  
551 replicated chromosomes. Thus, any model of CI and rescue, be it toxin/anti-toxin, lock-key,  
552 titration, or timing, must account for the fact that some effects of *Wolbachia* on the sperm are  
553 not realized until hours and many cell cycles later when the embryos progress through the mid-  
554 blastula transition and the late blastoderm divisions.

## 555 **MATERIALS AND METHODS**

### 556 *Drosophila* stocks

557 All stocks were grown on standard brown food (Sullivan, 2000) at 25°C with a 12h light/dark  
558 cycle. Uninfected *Drosophila simulans* stocks were generated by tetracycline-curing a *w-*  
559 *Wolbachia* (*wRiv*)-infected stock (Serbus et al., 2015). Uninfected and infected stocks were  
560

561 allowed to grow for many generations prior to their use. Throughout these experiments, we  
562 routinely checked for the presence/absence of *Wolbachia* by PCR with primers against the 16s  
563 rRNA gene of *Wolbachia*.

564  
565 An uninfected *egfp*-bearing stock was obtained from the National *Drosophila* Species Stock  
566 Center (Cornell College of Agriculture and Life Sciences; #275; w[501];  
567 PBac(GreenEye.UAS.tubEGFP)Dsim3) (Holtzman et al., 2010). *Wolbachia* was introduced to  
568 this stock by crossing to *Wolbachia*-infected females. Progeny was backcrossed to obtain flies  
569 homozygous for *egfp*. Stocks were routinely checked for *Wolbachia* and *egfp* presence by PCR  
570 with primers against the 16s rRNA gene of *Wolbachia* and *egfp* respectively. Males from this  
571 stock were used for experiments in which infected father transmitted an *egfp* transgene to  
572 offspring.

573  
574 Embryos were collected from crosses of 3-5 day old flies (Figures 1, S1, 2, 3) or 2-4 day old  
575 flies (Figures S2, 4-6). For experiments in Figure 1-3 embryos were collected for 4 days after  
576 the initial collection. For all other experiments, embryos were collected only on the initial  
577 collection.

578  
579 *Egg hatch assays*

580 For experiments involving egg hatch assays (Figure 1, S1, 4), collected embryos were aged in a  
581 humid chamber at 25°C for at least 30h before hatched eggs were counted.

582  
583 *Embryo fixation*

584 For fixed experiments assaying embryo stage, abnormalities, and nuclear fallout, 1-6h (Figure  
585 1A-B'), 2.5-3h (Figure 1C-D'), 0-4h (Figure 2), and 1-4h (Figures 3) embryos were  
586 dechorionated in bleach, washed thoroughly in water, and transferred to a 1:1 ratio of heptane  
587 and 32% paraformaldehyde for 5 min. Paraformaldehyde was subsequently removed and  
588 replaced with methanol and shaken vigorously. Heptane was removed and embryos stored in  
589 methanol at 4°C. Embryos were mounted directly in PI (Figure 1A-B') or DAPI with Vectashield  
590 (Vector H-1200) (Figures 1C-D', 2, 3).

591  
592 For fixed experiments analyzing nuclear detachment from centrosomes (Figure 3), 1-4h  
593 embryos were initially fixed as described above. Embryos were rehydrated in PBT (PBS +  
594 0.05% Triton + 1% BSA), blocked for 1h, and incubated with rabbit anti-centrosomin antibody  
595 (1:200) (Megraw et al., 1999). After 3x washes in PBT, embryos were incubated with anti-  
596 rabbit-Alexa488 secondary (1:1000 ThermoFisher A-11008). Embryos were washed 3x in PBT,  
597 rinsed 4X in PBS, and counterstained with DAPI in Vectashield.

598  
599 For fixed experiments assaying chromosome segregation errors in gastrulating embryos (Figure  
600 S2), 3-5h embryos were dechorionated in bleach, washed thoroughly in water, and  
601 permeabilized in heptane for 2.5 min. Embryos were fixed by adding an equal volume methanol  
602 to the heptane and shaking vigorously. Heptane was removed, and embryos stored at 4°C in  
603 methanol. Embryos were mounted directly in DAPI with Vectashield.

604  
605 For fixed experiments involving fluorescence in situ hybridization (Figure 6, S5), 2-5h embryos  
606 were dechorionated in bleach, washed thoroughly in water, and permeabilized in ice cold  
607 heptane for 2.5 min. Embryos were fixed in an ice cold 4% paraformaldehyde-46% PBS-50%  
608 heptane mixture for 10 min. Following removal of the paraformaldehyde-PBS solution, an equal  
609 volume of ice cold methanol was added to the heptane and shaken vigorously. Heptane was  
610 then removed. Embryos were then stored at 4°C in methanol.

611



612 *Live embryo staging*

613 For experiments involving live embryo staging (Figures S1, 5), embryos were collected for 45  
614 min, hand dechorionated, covered in halocarbon oil, and aged in a humid chamber at 25°C for  
615 2.5h. Embryo stage was either scored after this time (Figure S1) or for every 60 min (Figure 5).  
616 Embryos were staged using an Olympus SZH10 high-powered dissecting scope. Live images  
617 presented in Figure 1 were acquired on a Zeiss Axiozoom V.16 microscope equipped with a  
618 Zeiss AxioCam HRm monochrome camera. Images were acquired with Zeiss Zen software.

619  
620 *Embryo injection*

621 For live imaging experiments (Figure 4), 0.5-1.5h embryos were hand dechorionated, placed in  
622 halocarbon oil, and injected with rhodamine-labeled histone. Embryos were imaged directly  
623 after injection in areas adjacent to the injection site.

624  
625 *Fluorescence in situ hybridization*

626 Alexa488-conjugated probes targeting the *D. simulans* Y-chromosome (AAT-AAA-C)<sub>4</sub> (Ferree &  
627 Barbash, 2009) were synthesized by Integrated DNA Technologies (Coralville, IA, USA).  
628 Paraformaldehyde-fixed embryos were rehydrated in PBT (PBS + 0.05% Triton + 1% BSA).  
629 Embryos were washed in 4x saline sodium citrate (SSC), 10% formamide, 50mM imidazole for  
630 1h at 37°C. Embryos were hybridized with probes in hybridization buffer (4x SSC, 10%  
631 formamide, 0.0001% dextran sulfate) at 92°C for 3 min then 37°C overnight. Embryos were  
632 washed 3x in 2x SSC, 50% formamide for 10 min at 37°C, rinsed 4x in PBS, and counterstained  
633 with DAPI in Vectashield.

634  
635 *Confocal imaging*

636 Live and fixed embryo imaging was performed on an inverted Leica DMI6000 SP5 scanning  
637 confocal microscope. DAPI was excited with a 405 nm laser and collected from 410-480 nm.  
638 Alexa488 was excited with a 488 nm laser and collected from 518-584 nm. Rhodamine was  
639 excited with a 543 nm laser and collected from 555-620 nm. PI was excited with 514 and 543  
640 nm lasers and collected from 627-732 nm. Embryos were imaged with either 10x/0.3, 20x/0.75,  
641 40x/1.25 oil, or 63x/1.4 oil objectives. All imaging was performed at room temperature. Images  
642 were acquired with Leica Application Suite Advanced Fluorescence software. For live imaging  
643 experiments (Figure 4), timepoints between images were every 12-60 sec depending on the  
644 size of the z-stack.

645  
646 *Single embryo PCR analysis*

647 Cellularized blastoderms were individually squashed and then lysed in 10 µL buffer containing  
648 Proteinase K and ThermoPol reaction buffer (New England BioLabs) for 45 min at 60°C then 10  
649 min at 95°C. PCR was run with 1 µL sample in 20 µL total reaction volume, using primers  
650 targeting *egfp* (5': ATCAAGCTTGTGAGCAAGGGCGAGGAGC; and 3':  
651 ACCTCGAGCTACTTGTACAGCTCGTCCATGC) (Cruachem). PCR was run as: 10 min at  
652 95°C, 31x(30 sec at 95°C, 1 min at 60°C, 1 min at 72°C), 10 min at 72°C. PCR products were  
653 resolved on a 1% agarose gel. These conditions regularly produced an ~1.4kb band only when  
654 the *egfp* transgene was present.

655  
656 *Single embryo sequencing*

657 Cellularized blastoderms were individually squashed, frozen in liquid nitrogen, and stored at -  
658 80°C. Library preparation (NexteraXT kit) and paired-end sequencing (Illumina HiSeq,  
659 2x150bp) was performed by Azenta Life Sciences (Indianapolis, IN, USA). As samples  
660 contained host DNA, *Wolbachia* (*wRI*) DNA, and an *egfp* insertion, we assembled a reference  
661 genome consisting of the *D. simulans* genome (WUGSC mosaic 1.0/droSim1 assembly  
662 (*Drosophila* 12 Genomes et al., 2007), UCSC Genome Browser, Santa Cruz, CA, USA), a *wRI*

663 genome ((Klasson et al., 2009) GenBank CP001391.1), and the *egfp* sequence from the *p-egfp*  
664 plasmid (Addgene, Watertown, MA, USA). We additionally included a 714 bp randomized  
665 sequence as a negative control.

666  
667 Reads were aligned to the reference genome using BWA-MEM2 (2.2.1) (Md et al., 2019).  
668 Duplicate reads were removed using Picard tools (2.27.1) (<http://broadinstitute.github.io/picard/>)  
669 and low-quality reads ( $q < 20$ ) were subsequently removed. BEDTools (2.26.0) (Quinlan & Hall,  
670 2010) was used to assign depth of coverage at each position in the genome. Read alignment  
671 and processing was performed using the Hummingbird Computational Cluster (UC Santa Cruz,  
672 Santa Cruz, CA, USA). Gene coordinate positions were determined in the UCSC Genome  
673 Browser.

674  
675 Percent depth of a gene was calculated by dividing the average depth across a gene by the  
676 average depth across the whole genome for that embryo and multiplying by 100%. Embryos  
677 were considered diploid if the mean depth of reads aligning to the *egfp* transgene was  
678 meaningful (around 50% for heterozygote embryos) and reads were distributed evenly across  
679 the entirety of the *egfp* transgene. To decrease stochastic noise and accurately assess  
680 potential chromosome loss, we analyzed 5 genes from each chromosome/chromosome arm (Y,  
681 X, 2L, 2R, 3L, 3R, 4). Chromosome/chromosome arm loss was considered if the depth of reads  
682 across multiple genes on a chromosome/chromosome arm dropped from either 100% to 50%  
683 (diploid) or from 100% to 0% (haploid). As a proof of concept, an example of natural  
684 chromosome “loss” can be observed in male embryos (Y-linked genes present) in which the  
685 depth of reads mapping to genes on the X chromosome are ~50% of the mean genome depth  
686 (hemizygous).

#### 687 *Egg-to-adult assays*

688 Egg hatch assays were performed using embryos collected from 2-4 day old flies. Eggs were  
689 counted and transferred to a new collection plate in a new collection bottle. Hatched eggs were  
690 counted after at least 30h. Adults were counted for each plate for as long as new adults were  
691 eclosing.  
692

#### 693 *Statistical analyses*

694 All statistical analyses were performed in R (4.0.5, R core team). The following statistical tests  
695 were used:  $\chi$ -square test (Figure 1, S1), two-sided paired t-test (Figure 1), two-sided Fisher’s  
696 exact test (Figure 2), Kruskal-Wallis test (Figures 3, S2, 6, S4), and Mann-Whitney tests  
697 (Figures S2, 4-6, S4).  
698

#### 699 *Figure preparation*

700 Graphs were created in R using the ggplot2 package (Wickham, 2016). To improve the clarity  
701 of certain panels, images were adjusted for brightness and contrast in FIJI. Figures were  
702 assembled in Adobe Illustrator (Adobe, San Jose, CA, USA).  
703

## 704 **ACKNOWLEDGEMENTS**

705 We thank Dr. Benjamin Abrams (UCSC Life Sciences Microscopy Center, RRID: SCR\_021135)  
706 for his technical support and assistance with microscopy experiments. We thank Dr. Shelbi  
707 Russell and Dr. Andreas Rechsteiner for their helpful advice on sequencing experiments and  
708 analysis. We thank Dr. Timothy Megraw who provided our lab with the anti-centrosomin  
709 antibody. We thank Dr. Jonathan Minden for providing rhodamine-labeled histones. This work  
710 was funded by an NIH grant NIGMS-1R35GM139595 awarded to W. Sullivan.  
711

## 712 **AUTHOR CONTRIBUTIONS**

713

714 W.S. conceived the manuscript. B.W. contributed to the planning, execution, and analysis of  
715 experiments involving live imaging (Figure 4), paired analysis of embryo stage and hatch rate  
716 (Figure 1), single embryo PCR and sequencing analysis (Figure 5, Figure S3), staining of  
717 gastrulating embryos (Figures S2, 6, S5), and egg-to-adult assays (Figure S4). S.T. contributed  
718 to the planning, execution, and analysis of experiments involving abnormal embryo counts  
719 (Figure 2), nuclear fallout (Figure 3), live imaging (Figure 4), and the planning of egg-to-adult  
720 assays (Figure S4). M.A. contributed the execution and analysis of experiments involving single  
721 embryo PCR and sequencing analysis (Figure 5, S3), staining of gastrulating embryos (Figures  
722 6, S5), and egg-to-adult assays (Figure S4). G.V. contributed to the execution and analysis of  
723 experiments involving live imaging (Figure 4), paired analysis of embryo stage and hatch rate  
724 (Figure 1), and staining of gastrulating embryos (Figure S2). N.L. contributed to the execution  
725 and analysis of experiments involving embryo stage and hatch rate (Figures 1 and S1). K.H.  
726 contributed to the execution of paired analysis of embryo stage and hatch rate (Figure 1). W.S.  
727 contributed to the planning, execution, and analysis of experiments involving embryo stage and  
728 hatch rate (Figures 1 and S1), abnormal embryo counts (Figure 2), nuclear fallout (Figures 3),  
729 and live imaging (Figure 4). W.S., B.W., S.T., and M.A. contributed to all aspects of manuscript  
730 writing and preparation.

731

### 732 **DECLARATION OF INTERESTS**

733 The authors declare no competing financial interests.

734

735 **FIGURES**  
Figure 1

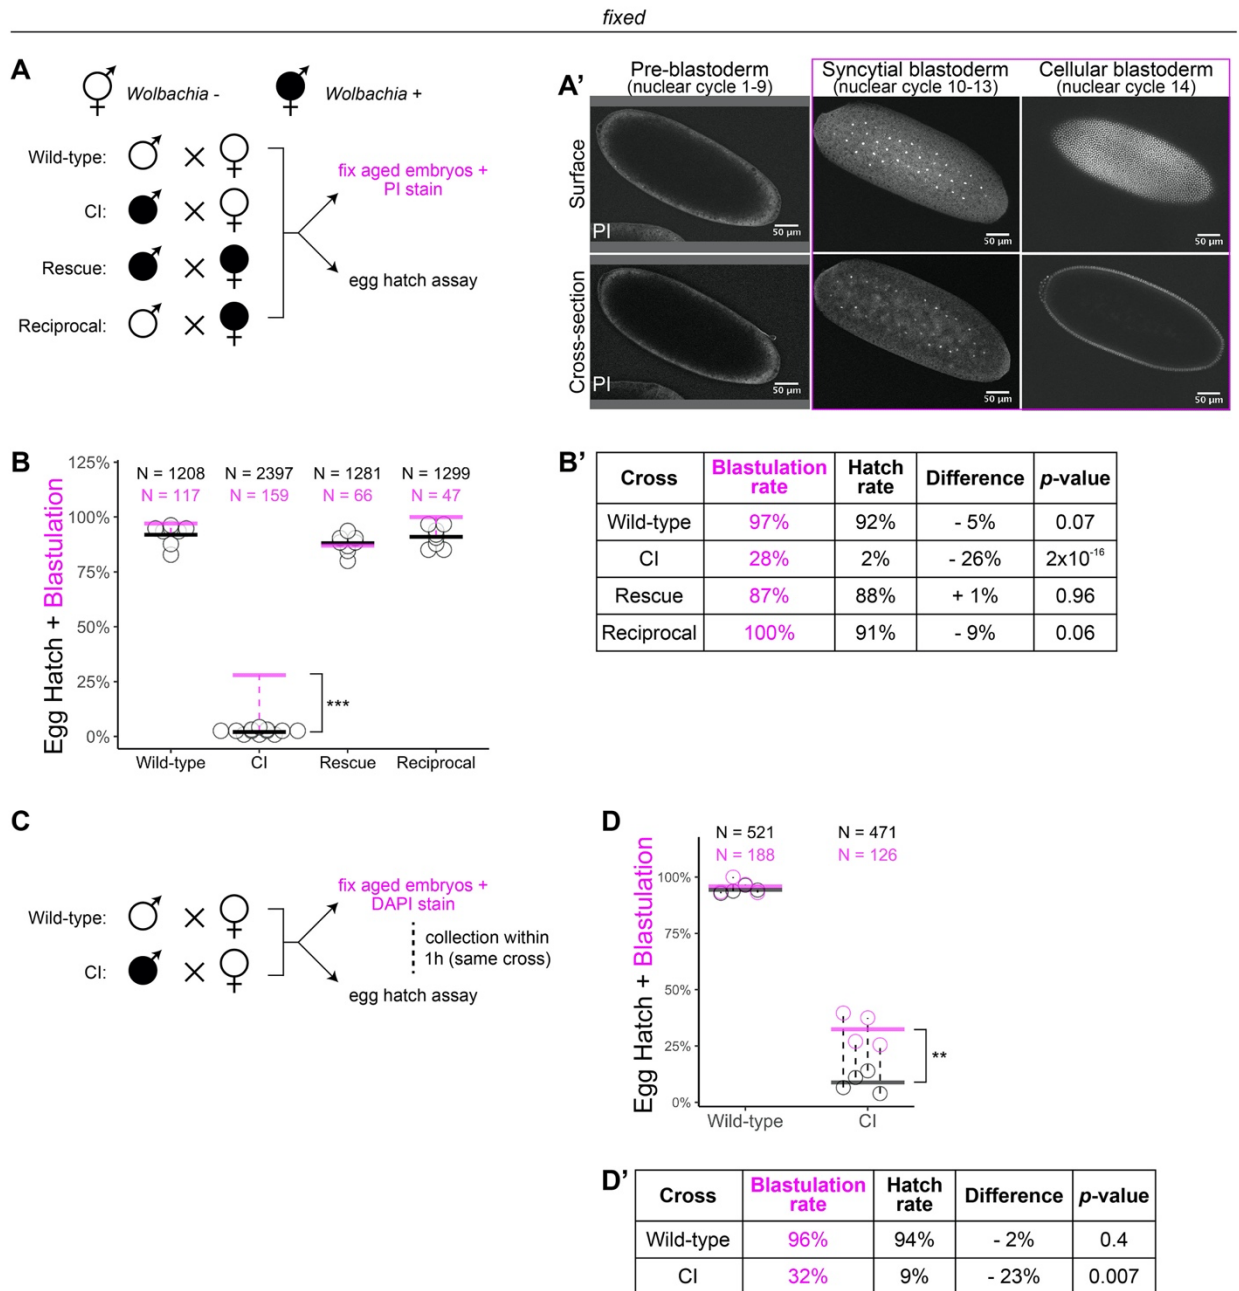

736  
737  
738  
739  
740  
741  
742  
743  
744  
745  
746

**Figure 1. *Wolbachia* induces both early and late embryonic lethality**

(A) *Wolbachia* infection status is indicated by filled circles. Embryos were collected from each of the four crosses and either used for egg hatch assays or aged prior to fixing and staining DNA with propidium iodide (PI). (A') Confocal imaging of PI-stained embryos allowed categorization of embryo stage as pre-blastoderm (cycles 2-9), syncytial blastoderm (cycles 10-13), or cellular blastoderms (cycle 14). Scale bars are 50 μm (B-B') Comparison between blastulation rate (% of fixed embryos staged as progressing beyond cycle 9) and egg hatch rate between each of the four crosses. Each circle represents one egg hatch assay. Black and magenta lines represent the average egg hatch rate and the blastulation rate respectively. While the hatch rate from wild-type, rescue, and reciprocal crosses closely corresponded to the



747 blastulation rate, the hatch rate from CI embryos was statistically significantly decreased  
748 compared to the blastulation rate. (C) Embryos were collected from wild-type and CI crosses  
749 and were used to either determine embryo stage (by DAPI staining) or egg hatch percentage in  
750 paired assays (collections were from the same crosses within 1h of each other). (D-D')  
751 Comparison between blastulation rate (% of fixed embryos staged as progressing beyond cycle  
752 9) and egg hatch for each cross. Each circle represents an experimental replicate. Dashed  
753 lines connect paired experiments. Black and magenta lines represent the average egg hatch  
754 rate and the blastulation rate respectively. The difference between blastulation rate and hatch  
755 rate was statistically significant by a two-sided paired t-test (D'). See also Figure S1.  
756

Figure 2

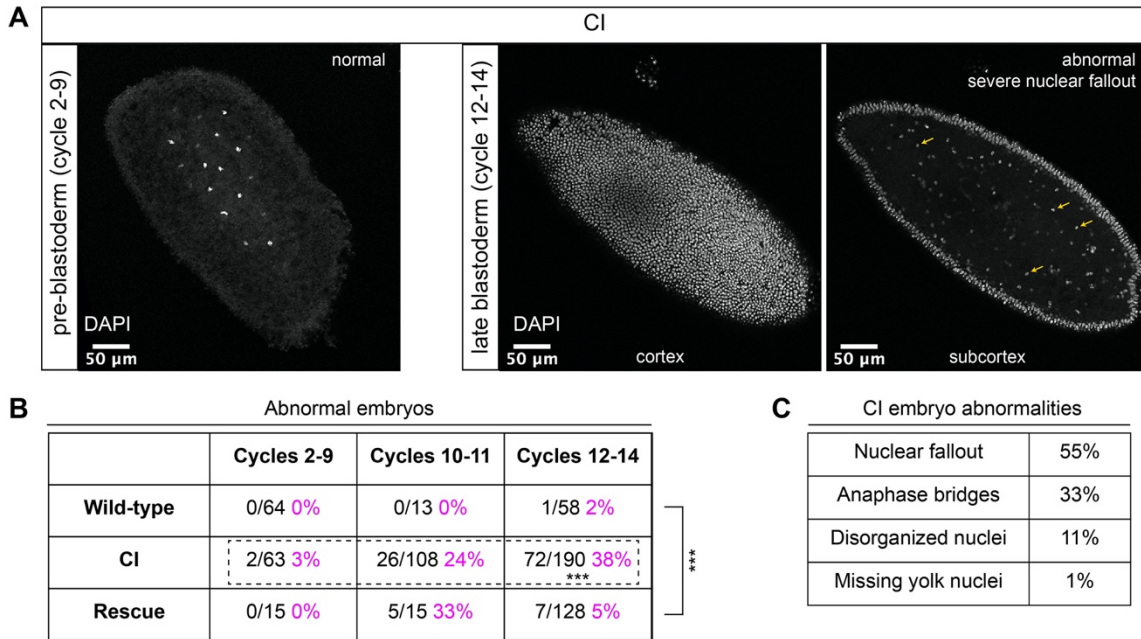

757

758

759 Figure 2. CI-derived embryos proceed normally through pre-blastoderm divisions and then

760 exhibit cellular defects during blastoderm divisions

761 (A) Examples of fixed and DAPI-stained CI-derived embryos from pre-blastoderm (cycles 2-9),

762 and late blastoderm (12-14) stages. While the CI-derived pre-blastoderm appears normal, the

763 late blastoderm exhibits severe nuclear fallout (nuclei receded from the cortex and into

764 subcortical regions). Arrows point to several examples of fallen out nuclei. Scale bars are 50

765  $\mu\text{m}$ . (B) Comparison of the percentage of abnormal embryos from wild-type, CI, and rescue

766 crosses during different stages of embryogenesis. While CI-derived embryos developed

767 normally through cycles 2-9, they exhibited significantly increased abnormalities during cycles

768 10-14. Abnormalities in cycles 10-14 were significantly reduced in embryos from rescue

769

770

Figure 3

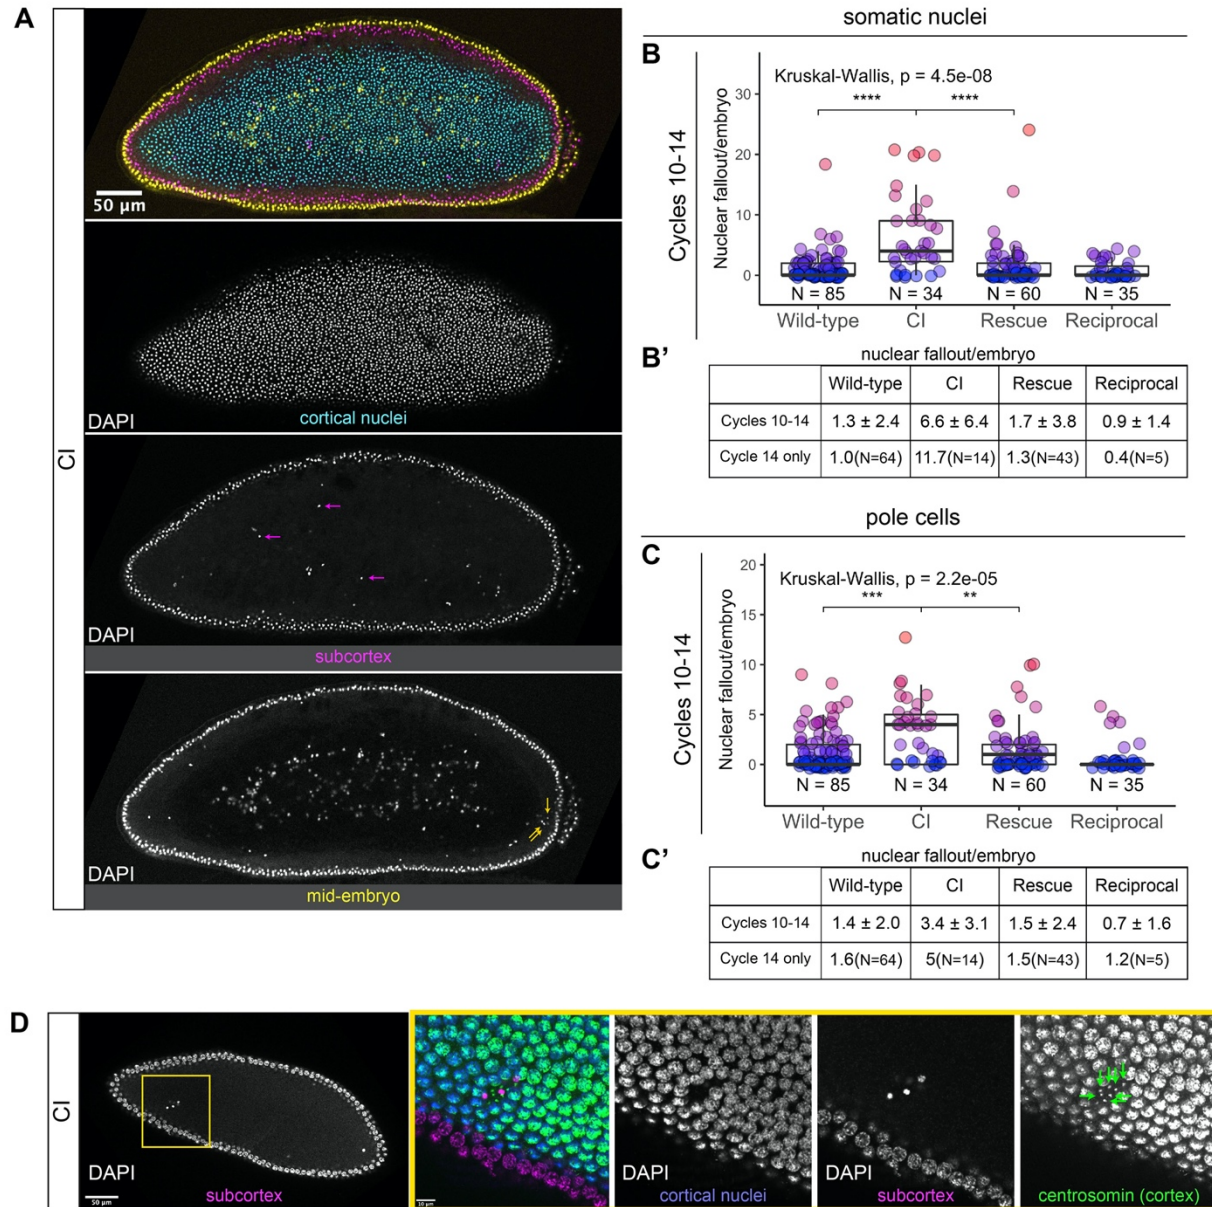

771  
 772 **Figure 3. Developed CI-derived embryos exhibit increased rates of nuclear fallout**  
 773 (A) Image of a CI-derived blastoderm exhibiting moderate nuclear fallout. Cortical nuclei (cyan)  
 774 are on the surface of the embryo. Nuclei that have fallen out of the cortex can clearly be  
 775 observed 5-10  $\mu\text{m}$  beneath the cortex (subcortex, magenta) and at the mid-plane of the embryo  
 776 (yellow). Magenta arrows point to examples of somatic nuclei that have fallen out. Yellow  
 777 arrows point to examples of pole cells that have fallen out. Scale bar is 50  $\mu\text{m}$  (B-B')  
 778 Comparison of somatic nuclear fallout in cycle 10-14 embryos from wild-type, CI, rescue, and  
 779 reciprocal crosses. (B) Each dot represents the number of fallen nuclei per embryo. (B')  
 780 Averages and standard deviations are summarized. CI-derived embryos have significantly  
 781 increased somatic nuclear fallout compared to wild-type- and rescue-derived embryos. (C-C')  
 782 Comparison of pole cell nuclear fallout in cycle 10-14 embryos from wild-type, CI, rescue, and  
 783 reciprocal crosses. (C) Each dot represents the number of fallen nuclei per embryo. (C')

784 Averages and standard deviations are summarized. CI-derived embryos have significantly  
785 increased somatic nuclear fallout compared to wild-type- and rescue-derived embryos. (D) CI-  
786 derived embryo stained with anti-centrosomin antibody to mark centrosomes and  
787 counterstained with DAPI. While cortical nuclei (blue) remain strongly associated with their  
788 centrosomes (green), nuclei that recede into the subcortex (magenta) detach from their  
789 centrosomes that are left at the cortex (green arrows). Yellow box indicates zoomed region.  
790 Scales bars are 50  $\mu\text{m}$  and 10  $\mu\text{m}$  for unzoomed and zoomed regions respectively.  
791  
792



Figure 4

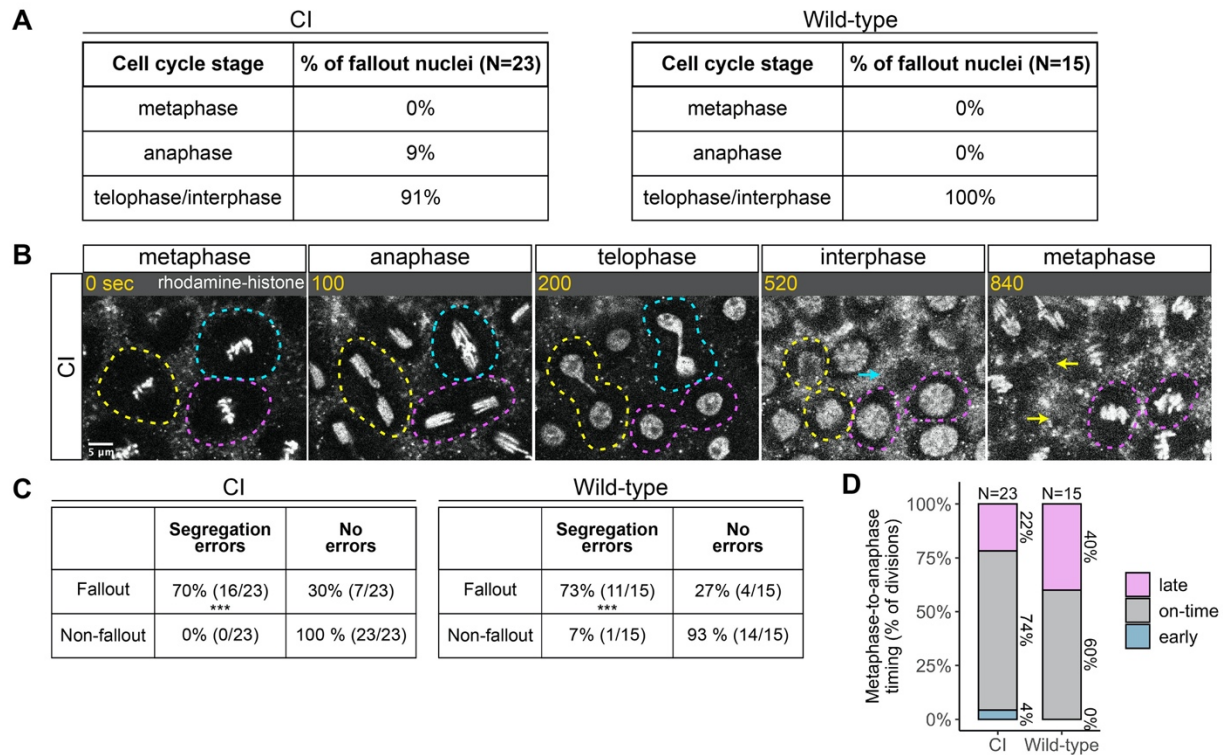

793  
794  
795  
796  
797  
798  
799  
800  
801  
802  
803  
804  
805  
806  
807  
808

**Figure 4. Chromosome segregation errors are the proximate cause of nuclear fallout in CI-derived embryos**

(A) Comparison of when in the cell cycle nuclei fallout in both CI- and wild-type-derived embryos. (B) Nuclei that fallout (yellow and blue circles) exhibit severely lagging chromosomes in the previous division, while nuclei that remain at the cortex (magenta circle) exhibit normal chromosome segregation. Scale bar is 5  $\mu\text{m}$ , and time is written in sec. See also Movie 1. (C) Comparison of chromosome segregation errors between nuclei destined to fallout and their neighbors that remain at the cortex (“non-fallout”) in both CI- and wild-type-derived embryos. (D) Comparison of metaphase-to-anaphase timing between nuclei destined to fallout and their neighbors that remain at the cortex in both CI- and wild-type-derived embryos. “Early” = fallout nuclei enter anaphase before their neighbors. “On-time” = fallout and neighboring nuclei enter anaphase simultaneously. “Late” = fallout nuclei enter anaphase after their neighbors. See also Figure S2.

Figure 5

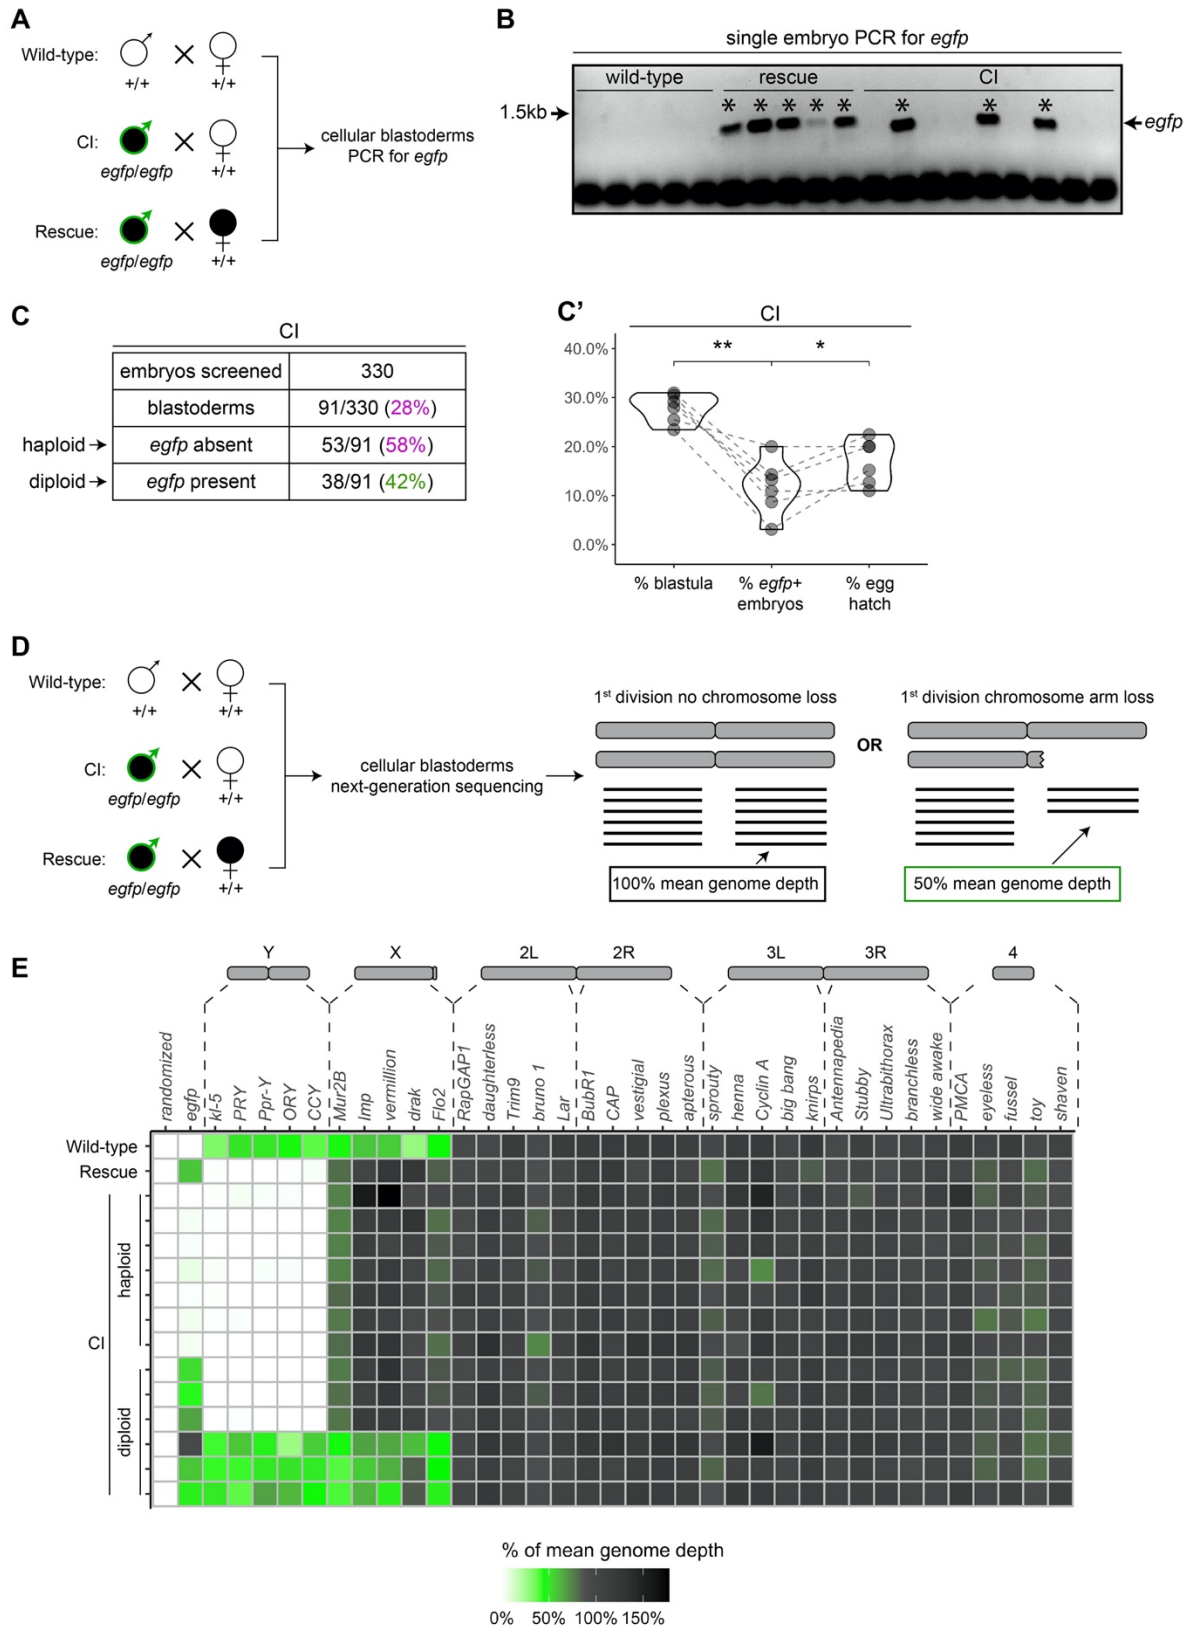

810 Figure 5. Late-stage CI-derived embryos are either haploid (maternal chromosome set) or  
811 diploid (both parental chromosome sets)  
812 (A) Embryos were collected from wild-type crosses or CI and rescue crosses in which the father  
813 was homozygous for an *egfp* transgene. Embryos were staged live, and cellular blastoderms  
814 were selected for single embryo PCR analysis with primers recognizing *egfp*. (B) A  
815 representative gel showing detection of *egfp* (asterisks) in all rescue-derived embryos and in a  
816 mix of CI-derived embryos. No *egfp* is detected in the wild-type control. (C) Summary of the  
817 percentage of screened CI-derived cellular blastoderms in which either *egfp* was absent  
818 (haploid) or *egfp* was present (diploid). (C') Comparison of the percentages of embryos that  
819 had reached at least cycle 10 (% blastula), had detectable *egfp* bands (% *egfp*+ embryos) and a  
820 concomitant egg hatch (% egg hatch). Each dot represents one experimental replicate, and  
821 lines connect values for the same experiment. The percentage of *egfp*+ embryos (diploids) was  
822 more associated with the percentage of eggs that hatched ( $p=0.045$  by Mann-Whitney test) than  
823 with the percentage of blastoderms screened ( $p=0.001$  by Mann-Whitney test), suggesting  
824 haploid embryos do not hatch. (D) Embryos were collected from wild-type crosses or CI and  
825 rescue crosses in which the father was homozygous for an *egfp* transgene. Embryos were  
826 staged live, and cellular blastoderms were selected for single embryo sequencing. If  
827 chromosome arms were not lost during the first division, the mean depth of reads mapping to  
828 the chromosome arm should be near the mean depth of reads mapping to the genome (black  
829 box). If chromosome arms were lost during the first division, the mean depth of reads aligning  
830 to that chromosome arm should be 50% of the mean depth of reads aligning to the genome  
831 (green box). In haploids, maternal chromosome arm loss would result in no reads mapping to  
832 that chromosome arm. (E) Sequenced embryos were sorted as haploid or diploid based on the  
833 depth of reads mapping to *egfp*. Each box represents the mean depth of reads aligning to that  
834 gene divided by the mean depth of reads aligning to the whole genome ("mean genome depth").  
835 White = 0% of mean genome depth; green = 50% of mean genome depth; grey = 100% of  
836 mean genome depth; black = 150% of mean genome depth. Consistent with no partial  
837 chromosome/chromosome arm loss, genes across all chromosomes were present at 100%  
838 mean genome depth for both haploids and diploids (or 50% for X-linked genes when embryos  
839 are male). See also Figure S3. See also File S1.  
840  
841

Figure 6

Y chromosome-bearing gastrulating embryos only (diploids)

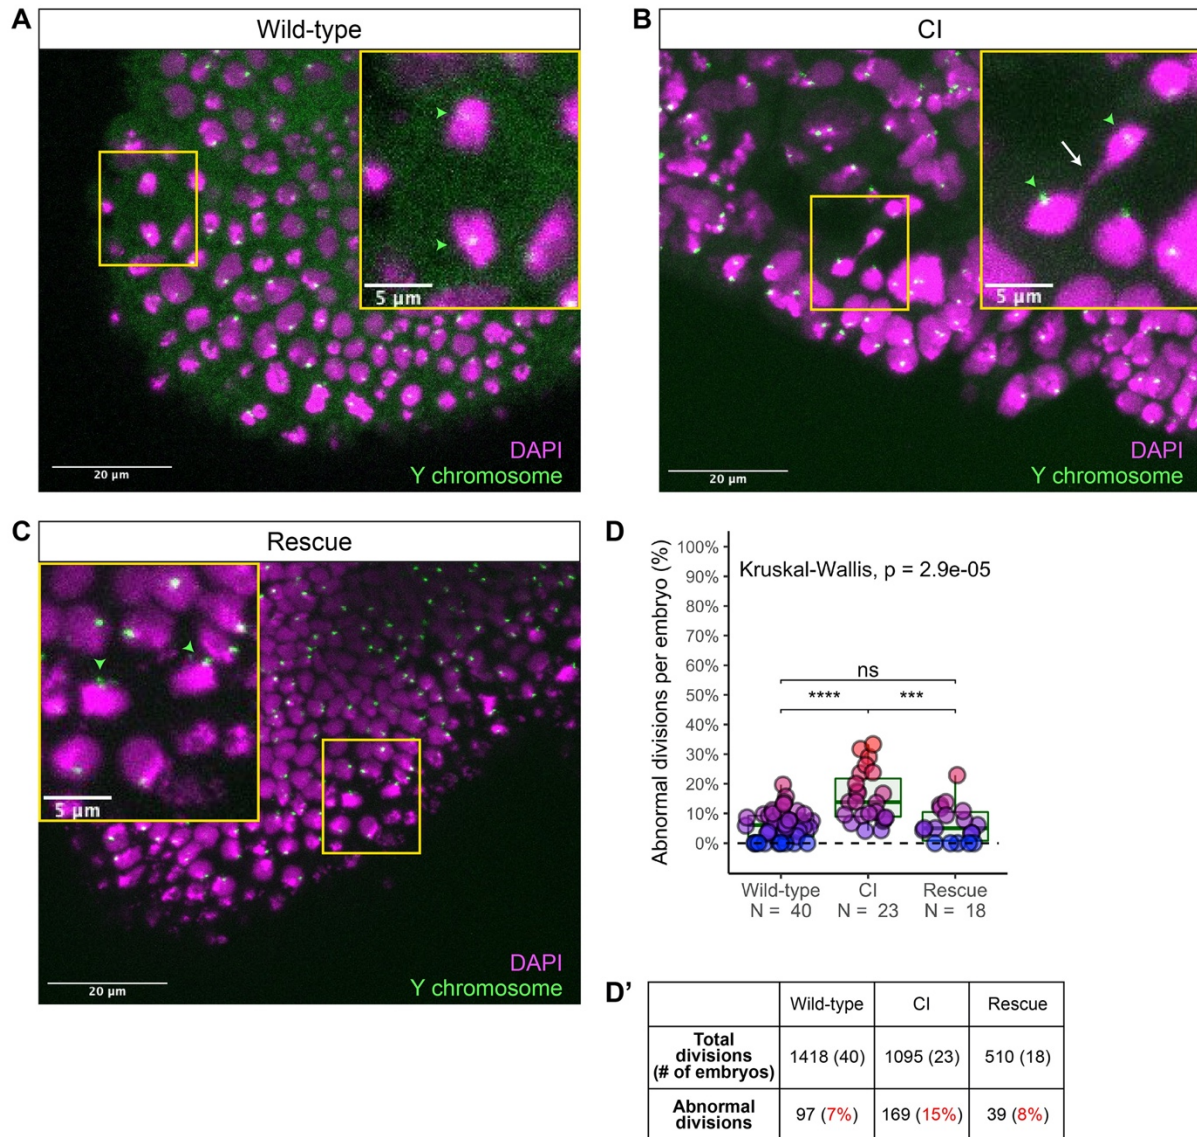

842  
 843 Figure 6. Diploid CI-derived gastrulating embryos that have escaped the first division defect  
 844 exhibit increased chromosome segregation errors  
 845 (A-C) Gastrulating embryos from wild-type (A), CI (B), and rescue (C) crosses. Embryos are  
 846 hybridized with probes that specifically recognize the *D. simulans* Y chromosome (green  
 847 arrowheads) to select for diploidy (both maternal and paternal chromosome sets present) and  
 848 counterstained with DAPI (magenta). Yellow boxes indicate zoomed in regions. Scale bars are  
 849 20  $\mu\text{m}$  and 5  $\mu\text{m}$  for unzoomed and zoomed images respectively. (A) Diploid wild-type-derived  
 850 embryos exhibit relatively normal chromosome segregation. (B) Diploid CI-derived embryos  
 851 have elevated rates of bridging and lagging chromosomes (arrow). (C) Diploid rescue-derived  
 852 embryos exhibit relatively normal chromosome segregation. (D) Comparison of the percentage  
 853 of chromosome segregation errors observed in diploid wild-type-, CI-, and rescue-derived  
 854 embryos. Each dot represents one embryo. (D') Summary of chromosome segregation errors  
 855 in wild-type-, CI-, and rescue-derived embryos. See also Figure S4.  
 856



Figure 7

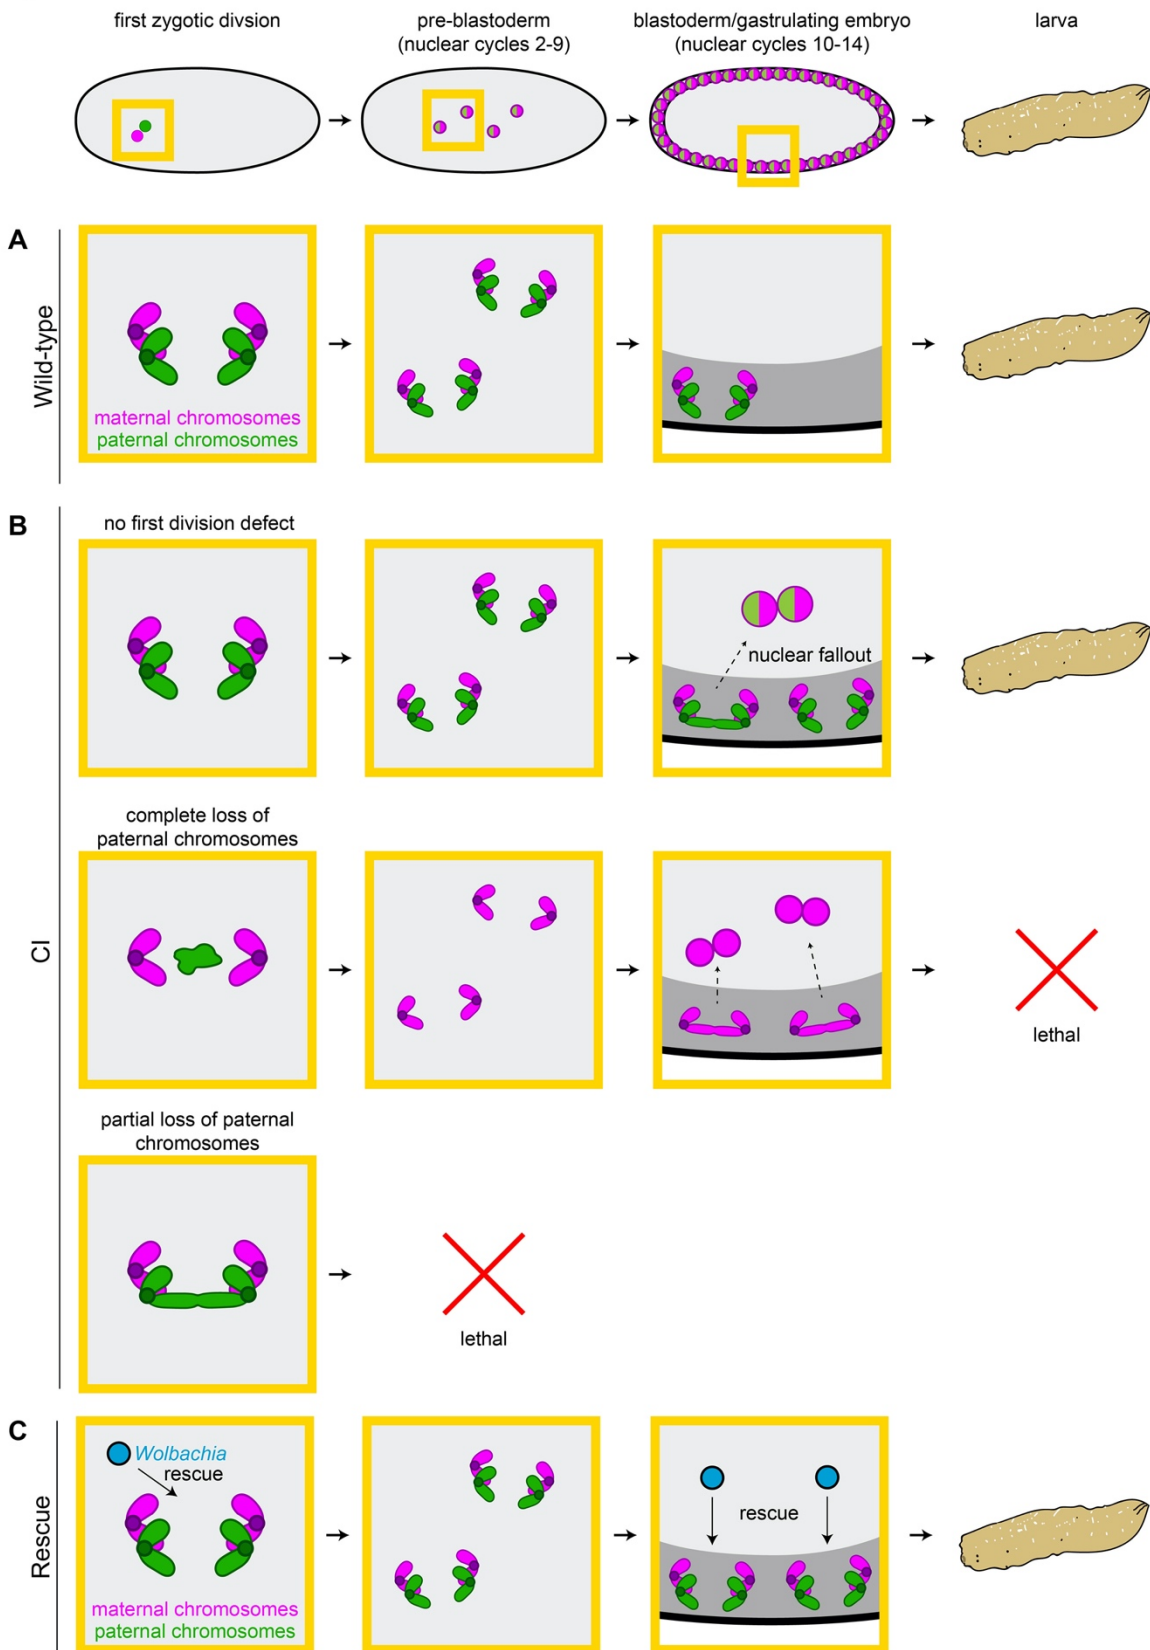

857



858 Figure 7. CI induces independent first division and mid-blastula transition chromosome  
859 segregation errors

860 (A) During the first zygotic division in wild-type derived embryos, paternal (green) and maternal  
861 (magenta) chromosomes segregate normally. Chromosome segregation occurs normally  
862 during pre-blastoderm, blastula, and post-cellularization divisions. Embryos hatch. (B, top row)  
863 In CI-derived embryos, if there are no segregation defects during the first division, embryos  
864 develop as diploids containing full maternal and paternal chromosome sets. Pre-blastoderm  
865 divisions proceed normally. However, during blastoderm stages, CI induces a second set of  
866 defects, which cause chromosome segregation errors and subsequent nuclear fallout (dashed  
867 arrow). Chromosome segregation errors continue during gastrulation. These defects occur at  
868 moderate frequencies and embryos hatch. (B, middle row) If the paternal chromosomes are  
869 completely excluded during the first division, embryos develop as haploids from only the  
870 maternal chromosome set. Pre-blastoderm divisions proceed normally, followed by increased  
871 chromosome segregation errors and nuclear fallout during blastoderm divisions. Chromosome  
872 segregation errors continue during gastrulation. Perhaps due to CI being strong in haploid  
873 embryos (Bonneau et al., 2018), this second set of CI-induced defects is more severe, and  
874 embryos fail to hatch, due to their haploidy. (B, bottom row) If the paternal chromosomes are  
875 partially lost during the first divisions, embryos arrest due to severe aneuploidy. (C) Maternally-  
876 supplied *Wolbachia* (blue circles) rescue both the first division defects and the late-stage  
877 defects independently.  
878

879 **SUPPLEMENTAL INFORMATION**

Figure S1

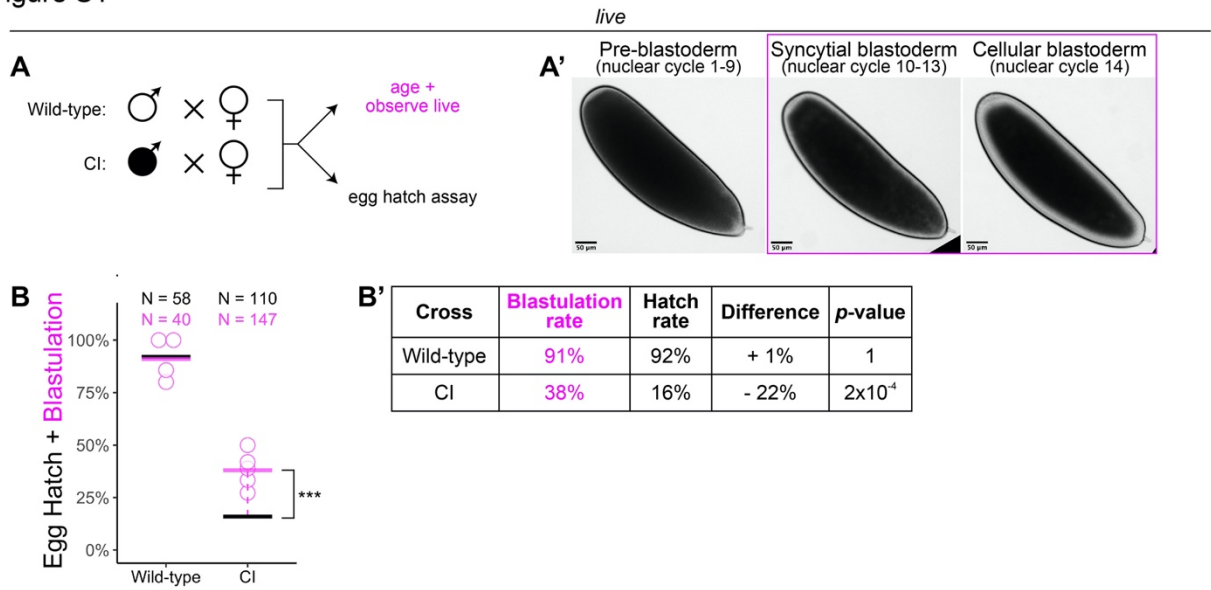

880

881 Figure S1, related to Figure 1. *Wolbachia* induces late embryonic lethality

882 (A) Embryos were collected from wild-type and CI crosses and either used for egg hatch assays  
 883 or aged and observed live. (A') Live observation of dechorionated embryos under a high-power  
 884 dissecting scope enabled categorization of embryo stage as pre-blastoderm, syncytial  
 885 blastoderm, or cellular blastoderms. Scale bars are 50 µm. (B-B') Comparison between  
 886 blastulation rate and egg hatch rate between wild-type and CI crosses. Each circle represents  
 887 one round of live categorization. Black and magenta lines represent the egg hatch rate and the  
 888 average blastulation rate respectively. See also Figure 1.

889

890

Figure S2

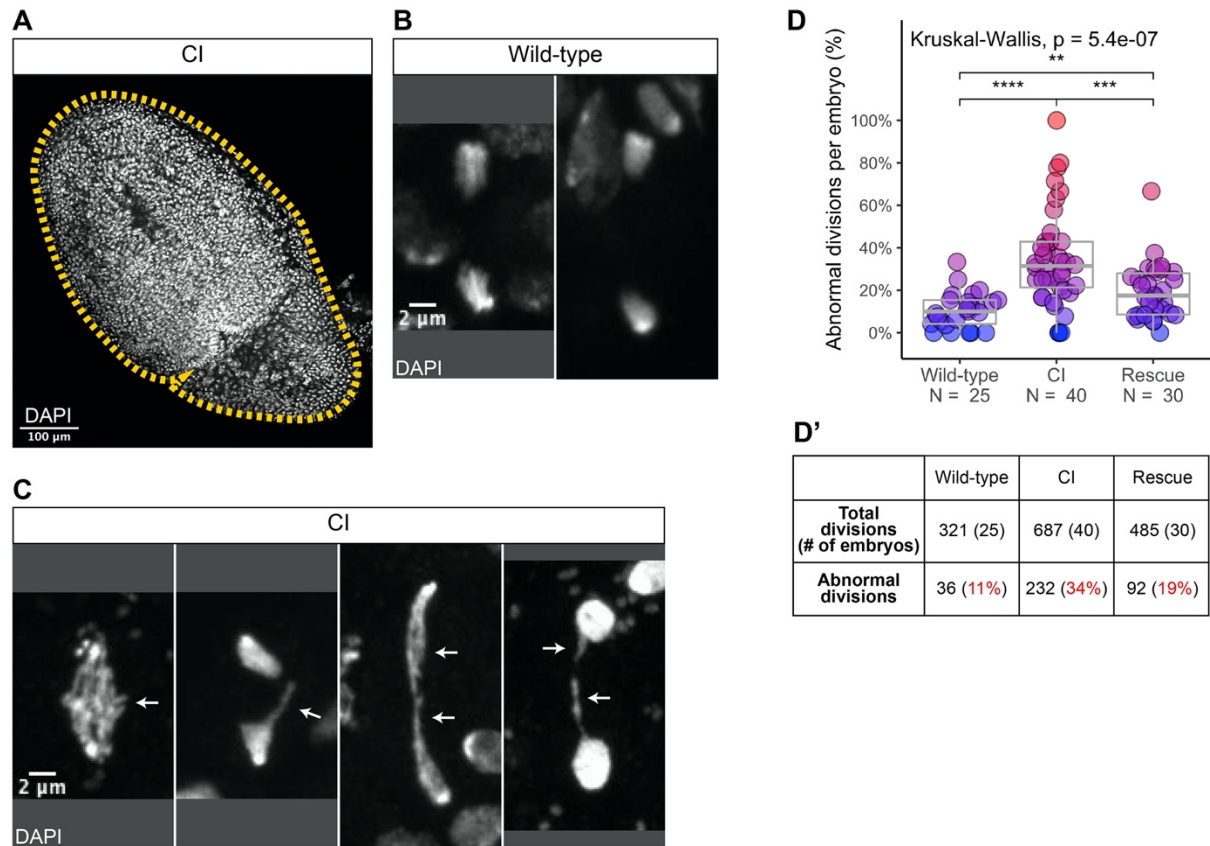

891  
892  
893  
894  
895  
896  
897  
898  
899  
900  
901  
902

Figure S2, related to Figure 3. CI-derived embryos exhibit increased rates of chromosome segregation errors and nuclear fallout

(A) A whole CI-derived gastrulating embryo is outlined. Scale bars is 100  $\mu\text{m}$ . (B-C) Examples of divisions observed in wild-type- (B) and CI- (C) derived gastrulating embryos. While divisions from wild-type-derived embryos are normal, divisions from CI-derived embryos exhibit a variety of lagging/bridging chromosome segregation errors (arrows). Scale bars is 2  $\mu\text{m}$ . (D-D') Comparison of chromosome segregation errors in wild-type-, CI-, and rescue-derived gastrulating embryos. Each dot represents one embryo (D), and a summation is presented in (D'). See also Figure 3.

Figure S3

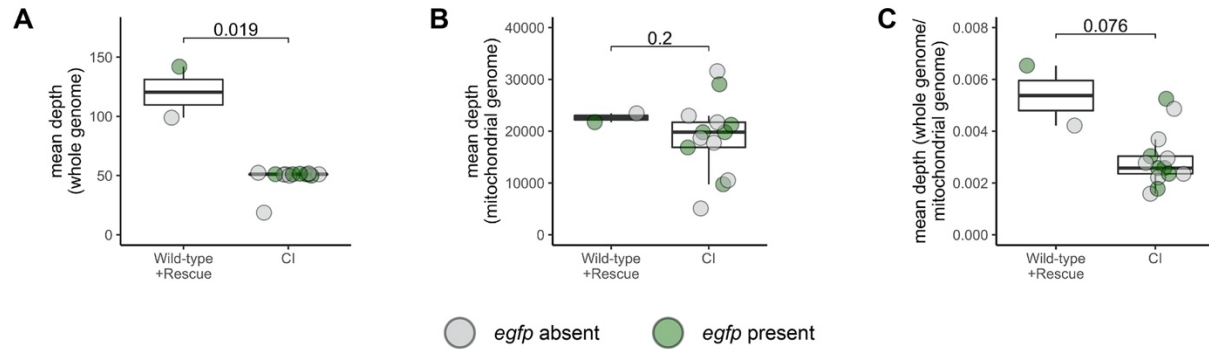

903  
904  
905  
906  
907  
908  
909  
910  
911  
912

Figure S3, related to Figure 5. Depth of reads aligning to genome in CI-derived cellularized embryos is decreased compared to wild-type- and rescue-derived embryos  
(A-C) Comparison of the mean depth of reads aligning to the reference genome (A), the mitochondrial genome (B), and the reference genome normalized to the mitochondrial genome (C) in wild-type-, CI-, and rescue-derived embryos. Each dot represents one embryo. Grey dots are embryos in which *egfp* was not detected (CI=haploids, wild-type=diploid). Green dots represent embryos in which *egfp* was detected (CI + Rescue = diploids). See also Figure 5.

Figure S4

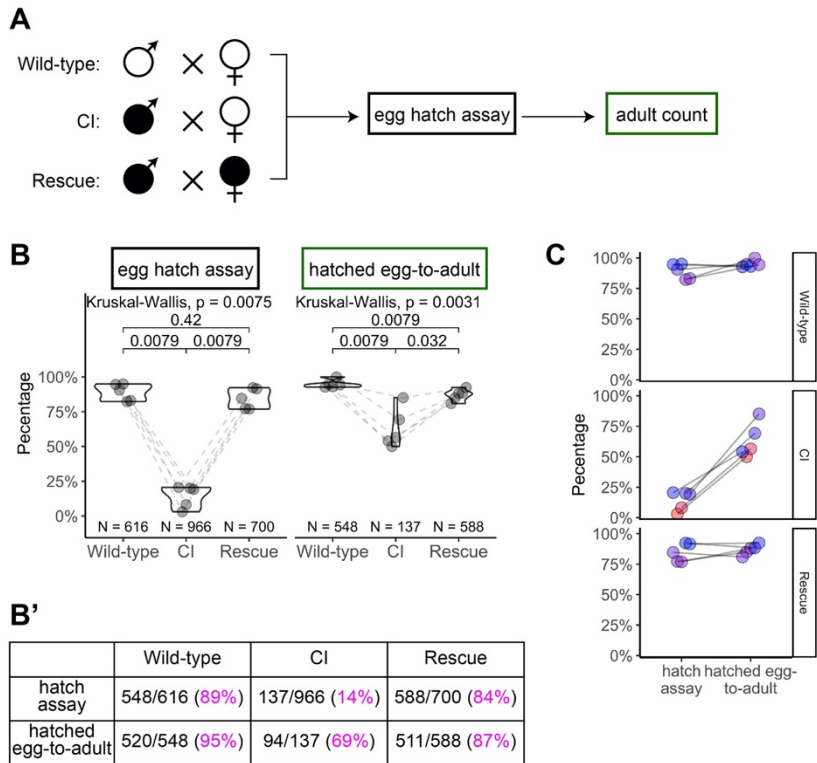

913  
 914 Figure S4, related to Figure 6. Hatched eggs from CI crosses exhibit significantly increased  
 915 lethality prior to eclosion than those from wild-type or rescue crosses  
 916 (A) Diagram of the “egg-to-adult” experiment. Eggs from egg hatch assays were placed in new  
 917 collection bottles. Adults were collected from hatched eggs and counted for as long as flies  
 918 were eclosing. (B-B’) Comparison of egg hatch rates and hatched egg-to-adult rates. Hatched  
 919 eggs from CI crosses had significantly reduced rates of developing into adults, suggesting the  
 920 existence of a CI-induced lethal phase during larval development. Maternally-supplied  
 921 Wolbachia rescues this larval lethality. Each dot represents one experiment/collection. Lines  
 922 connect experiments performed simultaneously. Unless otherwise indicated,  $p$  values displayed  
 923 were determined with Mann-Whitney tests. (C) Comparison of the strengths of early CI defects  
 924 (as judged by hatching) and late CI defects (as judged by the hatched egg-to-adult rates). In  
 925 general, higher lethality in hatching correlated to higher lethality during egg-to-adult  
 926 development. Each dot represents one experiment. Lines connect the egg hatch rate and the  
 927 hatched egg-to-adult rate for each experiment. See also Figure 6.  
 928



Figure S5

Non-Y chromosome-bearing gastrulating embryos (XX diploids or XØ haploids)

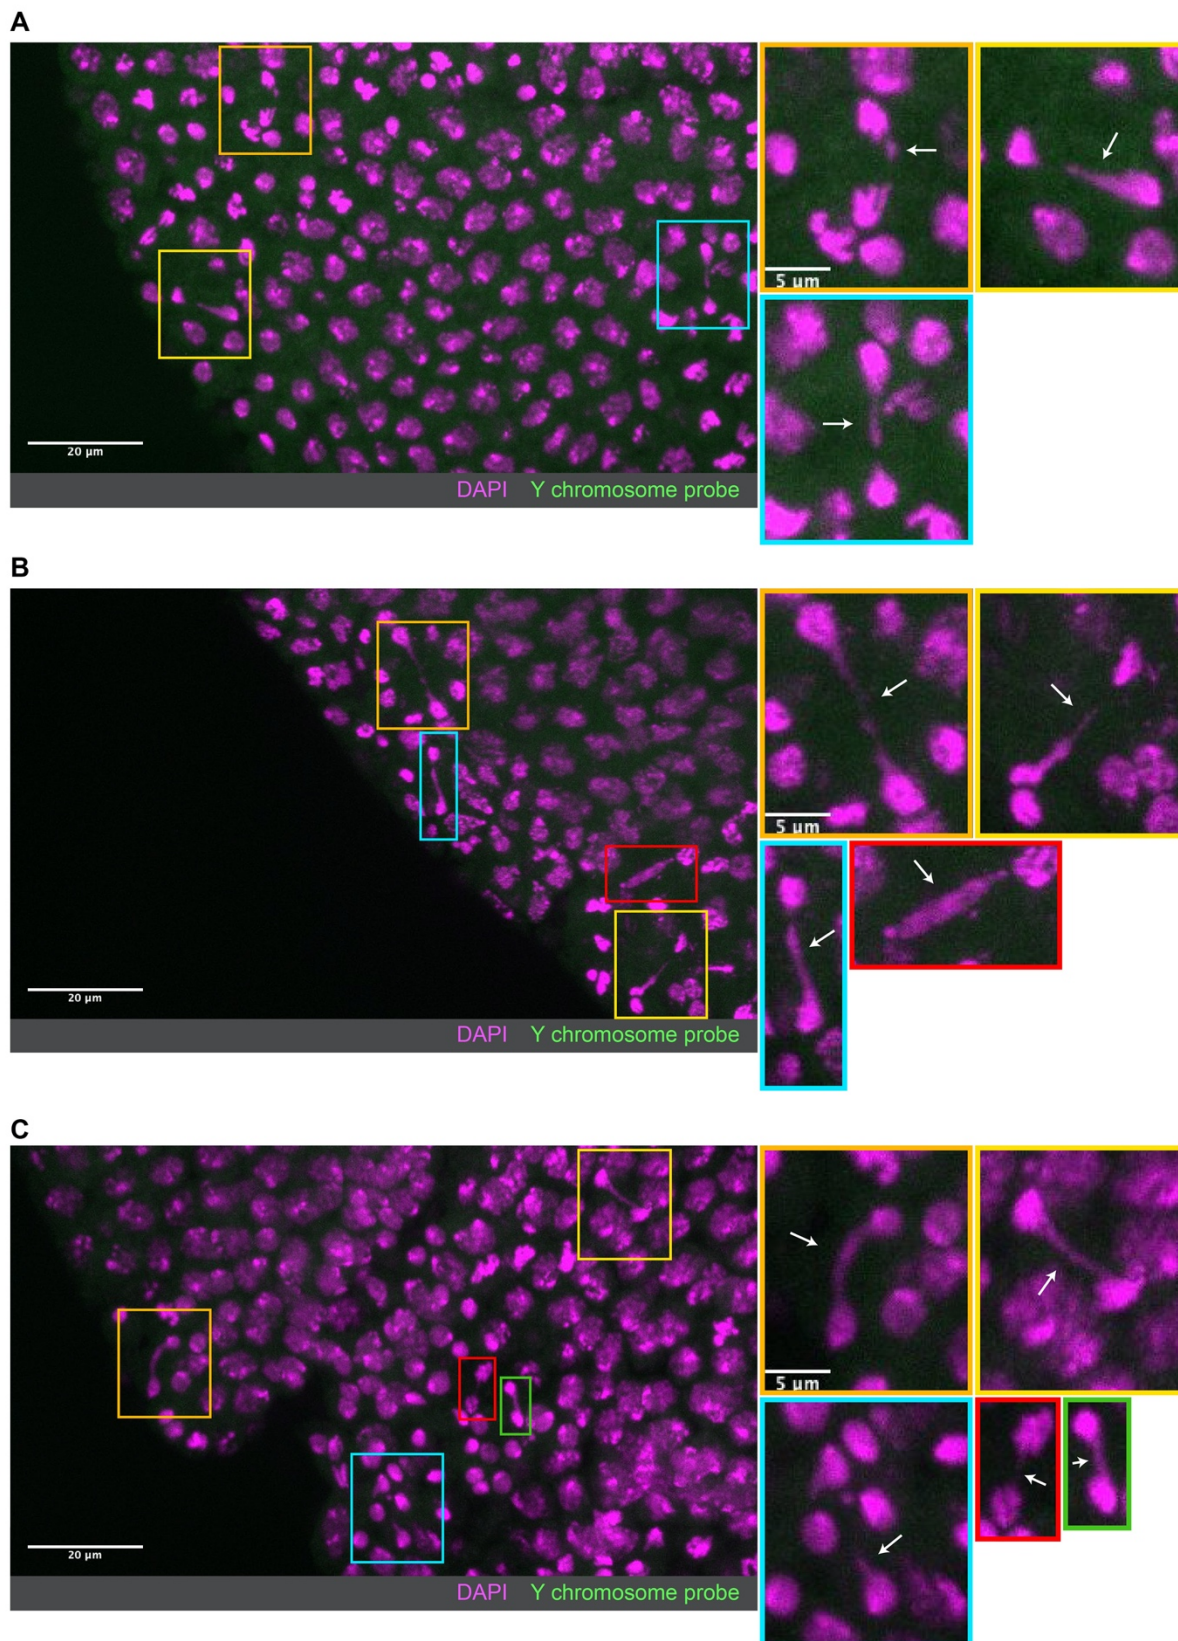

929

930 Figure S5, related to Figure 6. Non-Y chromosome-containing gastrulating embryos exhibit  
931 extensive chromosome segregation errors  
932 (A-C) Examples of non-Y chromosome-containing gastrulating embryos (haploid or diploid) with  
933 extensive chromosome segregation errors. No probes targeting the Y chromosome (green)  
934 were detected in these embryos. Embryos were counterstained with DAPI (magenta). The  
935 extent of errors observed in these embryos is not observed in Y chromosome-containing diploid  
936 embryos, suggesting these embryos may be haploid and more strongly experience the second  
937 set of CI-induced defects. Boxes indicate zoomed in regions. Scale bars are 20  $\mu\text{m}$  and 5  $\mu\text{m}$   
938 for unzoomed and zoomed images respectively. See also Figure 6.

#### 939 **MOVIE LEGENDS**

941 Movie 1, related to Figure 4. Chromosome segregation immediately precedes nuclear fallout of  
942 cortical blastoderm nuclei  
943 A CI-derived embryo injected with rhodamine-labeled histone. Scale bar is 5  $\mu\text{m}$  and time is in  
944 sec. See also Figure 4.

#### 945 **SUPPLEMENTAL FILES**

946 File S1. Depth of coverage for coding sequences and *egfp* in wild-type-, CI-, and rescue-  
947 derived cellular blastoderms

#### 948 **REFERENCES**

- 951 Beckmann, J. F., Ronau, J. A., & Hochstrasser, M. (2017). A Wolbachia deubiquitylating enzyme  
952 induces cytoplasmic incompatibility. *Nat Microbiol*, 2, 17007.  
953 <https://doi.org/10.1038/nmicrobiol.2017.7>
- 954 Bonneau, M., Atyame, C., Beji, M., Justy, F., Cohen-Gonsaud, M., Sicard, M., & Weill, M. (2018).  
955 *Culex pipiens* crossing type diversity is governed by an amplified and polymorphic  
956 operon of Wolbachia. *Nat Commun*, 9(1), 319. [https://doi.org/10.1038/s41467-017-](https://doi.org/10.1038/s41467-017-02749-w)  
957 [02749-w](https://doi.org/10.1038/s41467-017-02749-w)
- 958 Breeuwer, J. A., & Werren, J. H. (1990). Microorganisms associated with chromosome  
959 destruction and reproductive isolation between two insect species. *Nature*, 346(6284),  
960 558-560. <https://doi.org/10.1038/346558a0>
- 961 Callaini, G., Dallai, R., & Riparbelli, M. G. (1997). Wolbachia-induced delay of paternal chromatin  
962 condensation does not prevent maternal chromosomes from entering anaphase in  
963 incompatible crosses of *Drosophila simulans*. *J Cell Sci*, 110 ( Pt 2), 271-280.  
964 <https://doi.org/10.1242/jcs.110.2.271>
- 965 Callaini, G., Riparbelli, M. G., Giordano, R., & Dallai, R. (1996). Mitotic defects associated with  
966 cytoplasmic incompatibility in *Drosophila simulans*. *Journal of Invertebrate Pathology*,  
967 67(1), 55-64. <https://doi.org/DOI.10.1006/jipa.1996.0009>
- 968 Chen, H., Ronau, J. A., Beckmann, J. F., & Hochstrasser, M. (2019). A Wolbachia nuclease and its  
969 binding partner provide a distinct mechanism for cytoplasmic incompatibility. *Proc Natl*  
970 *Acad Sci U S A*, 116(44), 22314-22321. <https://doi.org/10.1073/pnas.1914571116>
- 971 Chen, H., Zhang, M., & Hochstrasser, M. (2020). The Biochemistry of Cytoplasmic  
972 Incompatibility Caused by Endosymbiotic Bacteria. *Genes (Basel)*, 11(8).  
973 <https://doi.org/10.3390/genes11080852>

- 974 Czech, B., & Hannon, G. J. (2016). One Loop to Rule Them All: The Ping-Pong Cycle and piRNA-  
975 Guided Silencing. *Trends Biochem Sci*, 41(4), 324-337.  
976 <https://doi.org/10.1016/j.tibs.2015.12.008>
- 977 Debec, A. (1978). Haploid cell cultures of *Drosophila melanogaster*. *Nature*, 274(5668), 255-256.  
978 <https://doi.org/10.1038/274255a0>
- 979 Deshmukh, S., Ponnaluri, V. C., Dai, N., Pradhan, S., & Deobagkar, D. (2018). Levels of DNA  
980 cytosine methylation in the *Drosophila* genome. *PeerJ*, 6, e5119.  
981 <https://doi.org/10.7717/peerj.5119>
- 982 *Drosophila* 12 Genomes, C., Clark, A. G., Eisen, M. B., Smith, D. R., Bergman, C. M., Oliver, B.,  
983 Markow, T. A., Kaufman, T. C., Kellis, M., Gelbart, W., Iyer, V. N., Pollard, D. A., Sackton,  
984 T. B., Larracuente, A. M., Singh, N. D., Abad, J. P., Abt, D. N., Adryan, B., Aguade, M.,  
985 Akashi, H., Anderson, W. W., Aquadro, C. F., Ardell, D. H., Arguello, R., Artieri, C. G.,  
986 Barbash, D. A., Barker, D., Barsanti, P., Batterham, P., Batzoglou, S., Begun, D., Bhutkar,  
987 A., Blanco, E., Bosak, S. A., Bradley, R. K., Brand, A. D., Brent, M. R., Brooks, A. N., Brown,  
988 R. H., Butlin, R. K., Caggese, C., Calvi, B. R., Bernardo de Carvalho, A., Caspi, A.,  
989 Castrezana, S., Celniker, S. E., Chang, J. L., Chapple, C., Chatterji, S., Chinwalla, A.,  
990 Civetta, A., Clifton, S. W., Comeron, J. M., Costello, J. C., Coyne, J. A., Daub, J., David, R.  
991 G., Delcher, A. L., Delehaunty, K., Do, C. B., Ebling, H., Edwards, K., Eickbush, T., Evans, J.  
992 D., Filipski, A., Findeiss, S., Freyhult, E., Fulton, L., Fulton, R., Garcia, A. C., Gardiner, A.,  
993 Garfield, D. A., Garvin, B. E., Gibson, G., Gilbert, D., Gnerre, S., Godfrey, J., Good, R.,  
994 Gotea, V., Gravely, B., Greenberg, A. J., Griffiths-Jones, S., Gross, S., Guigo, R., Gustafson,  
995 E. A., Haerty, W., Hahn, M. W., Halligan, D. L., Halpern, A. L., Halter, G. M., Han, M. V.,  
996 Heger, A., Hillier, L., Hinrichs, A. S., Holmes, I., Hoskins, R. A., Hubisz, M. J., Hultmark, D.,  
997 Huntley, M. A., Jaffe, D. B., Jagadeeshan, S., Jeck, W. R., Johnson, J., Jones, C. D., Jordan,  
998 W. C., Karpen, G. H., Kataoka, E., Keightley, P. D., Kheradpour, P., Kirkness, E. F., Koerich,  
999 L. B., Kristiansen, K., Kudrna, D., Kulathinal, R. J., Kumar, S., Kwok, R., Lander, E., Langley,  
1000 C. H., Lapoint, R., Lazzaro, B. P., Lee, S. J., Levesque, L., Li, R., Lin, C. F., Lin, M. F.,  
1001 Lindblad-Toh, K., Llopart, A., Long, M., Low, L., Lozovsky, E., Lu, J., Luo, M., Machado, C.  
1002 A., Makalowski, W., Marzo, M., Matsuda, M., Matzkin, L., McAllister, B., McBride, C. S.,  
1003 McKernan, B., McKernan, K., Mendez-Lago, M., Minx, P., Mollenhauer, M. U., Montooth,  
1004 K., Mount, S. M., Mu, X., Myers, E., Negre, B., Newfeld, S., Nielsen, R., Noor, M. A.,  
1005 O'Grady, P., Pachter, L., Papaceit, M., Parisi, M. J., Parisi, M., Parts, L., Pedersen, J. S.,  
1006 Pesole, G., Phillippy, A. M., Ponting, C. P., Pop, M., Porcelli, D., Powell, J. R., Prohaska, S.,  
1007 Pruitt, K., Puig, M., Quesneville, H., Ram, K. R., Rand, D., Rasmussen, M. D., Reed, L. K.,  
1008 Reenan, R., Reily, A., Remington, K. A., Rieger, T. T., Ritchie, M. G., Robin, C., Rogers, Y.  
1009 H., Rohde, C., Rozas, J., Rubenfield, M. J., Ruiz, A., Russo, S., Salzberg, S. L., Sanchez-  
1010 Gracia, A., Saranga, D. J., Sato, H., Schaeffer, S. W., Schatz, M. C., Schlenke, T., Schwartz,  
1011 R., Segarra, C., Singh, R. S., Sirot, L., Sirota, M., Sisneros, N. B., Smith, C. D., Smith, T. F.,  
1012 Spieth, J., Stage, D. E., Stark, A., Stephan, W., Strausberg, R. L., Strempel, S., Sturgill, D.,  
1013 Sutton, G., Sutton, G. G., Tao, W., Teichmann, S., Tobar, Y. N., Tomimura, Y., Tsolas, J.  
1014 M., Valente, V. L., Venter, E., Venter, J. C., Vicario, S., Vieira, F. G., Vilella, A. J., Villasante,  
1015 A., Walenz, B., Wang, J., Wasserman, M., Watts, T., Wilson, D., Wilson, R. K., Wing, R. A.,  
1016 Wolfner, M. F., Wong, A., Wong, G. K., Wu, C. I., Wu, G., Yamamoto, D., Yang, H. P.,  
1017 Yang, S. P., Yorke, J. A., Yoshida, K., Zdobnov, E., Zhang, P., Zhang, Y., Zimin, A. V.,



- 1018 Baldwin, J., Abdouelleil, A., Abdulkadir, J., Abebe, A., Abera, B., Abreu, J., Acer, S. C.,  
1019 Aftuck, L., Alexander, A., An, P., Anderson, E., Anderson, S., Arachi, H., Azer, M.,  
1020 Bachantsang, P., Barry, A., Bayul, T., Berlin, A., Bessette, D., Bloom, T., Blye, J.,  
1021 Boguslavskiy, L., Bonnet, C., Boukhgalter, B., Bourzgui, I., Brown, A., Cahill, P., Channer,  
1022 S., Cheshatsang, Y., Chuda, L., Citroen, M., Collymore, A., Cooke, P., Costello, M., D'Aco,  
1023 K., Daza, R., De Haan, G., DeGray, S., DeMaso, C., Dhargay, N., Dooley, K., Dooley, E.,  
1024 Doricent, M., Dorje, P., Dorjee, K., Dupes, A., Elong, R., Falk, J., Farina, A., Faro, S.,  
1025 Ferguson, D., Fisher, S., Foley, C. D., Franke, A., Friedrich, D., Gadbois, L., Gearin, G.,  
1026 Gearin, C. R., Giannoukos, G., Goode, T., Graham, J., Grandbois, E., Grewal, S., Gyaltsen,  
1027 K., Hafez, N., Hagos, B., Hall, J., Henson, C., Hollinger, A., Honan, T., Huard, M. D.,  
1028 Hughes, L., Hurhula, B., Husby, M. E., Kamat, A., Kanga, B., Kashin, S., Khazanovich, D.,  
1029 Kisner, P., Lance, K., Lara, M., Lee, W., Lennon, N., Letendre, F., LeVine, R., Lipovsky, A.,  
1030 Liu, X., Liu, J., Liu, S., Lokyitsang, T., Lokyitsang, Y., Lubonja, R., Lui, A., MacDonald, P.,  
1031 Magnisalis, V., Maru, K., Matthews, C., McCusker, W., McDonough, S., Mehta, T.,  
1032 Meldrim, J., Meneus, L., Mihai, O., Mihalev, A., Mihova, T., Mittelman, R., Mlenga, V.,  
1033 Montmayer, A., Mulrain, L., Navidi, A., Naylor, J., Negash, T., Nguyen, T., Nguyen, N.,  
1034 Nicol, R., Norbu, C., Norbu, N., Novod, N., O'Neill, B., Osman, S., Markiewicz, E., Oyono,  
1035 O. L., Patti, C., Phunkhang, P., Pierre, F., Priest, M., Raghuraman, S., Rege, F., Reyes, R.,  
1036 Rise, C., Rogov, P., Ross, K., Ryan, E., Settipalli, S., Shea, T., Sherpa, N., Shi, L., Shih, D.,  
1037 Sparrow, T., Spaulding, J., Stalker, J., Stange-Thomann, N., Stavropoulos, S., Stone, C.,  
1038 Strader, C., Tesfaye, S., Thomson, T., Thoulutsang, Y., Thoulutsang, D., Topham, K.,  
1039 Topping, I., Tsamla, T., Vassiliev, H., Vo, A., Wangchuk, T., Wangdi, T., Weiland, M.,  
1040 Wilkinson, J., Wilson, A., Yadav, S., Young, G., Yu, Q., Zembek, L., Zhong, D., Zimmer, A.,  
1041 Zwirko, Z., Jaffe, D. B., Alvarez, P., Brockman, W., Butler, J., Chin, C., Gnerre, S.,  
1042 Grabherr, M., Kleber, M., Mauceli, E., & MacCallum, I. (2007). Evolution of genes and  
1043 genomes on the *Drosophila* phylogeny. *Nature*, *450*(7167), 203-218.  
1044 <https://doi.org/10.1038/nature06341>  
1045 Duron, O., & Weill, M. (2006). Wolbachia infection influences the development of *Culex pipiens*  
1046 embryo in incompatible crosses. *Heredity (Edinb)*, *96*(6), 493-500.  
1047 <https://doi.org/10.1038/sj.hdy.6800831>  
1048 Farrell, J. A., & O'Farrell, P. H. (2014). From egg to gastrula: how the cell cycle is remodeled  
1049 during the *Drosophila* mid-blastula transition. *Annu Rev Genet*, *48*, 269-294.  
1050 <https://doi.org/10.1146/annurev-genet-111212-133531>  
1051 Farrell, J. A., Shermoen, A. W., Yuan, K., & O'Farrell, P. H. (2012). Embryonic onset of late  
1052 replication requires Cdc25 down-regulation. *Genes Dev*, *26*(7), 714-725.  
1053 <https://doi.org/10.1101/gad.186429.111>  
1054 Ferree, P. M., & Barbash, D. A. (2009). Species-specific heterochromatin prevents mitotic  
1055 chromosome segregation to cause hybrid lethality in *Drosophila*. *PLoS Biol*, *7*(10),  
1056 e1000234. <https://doi.org/10.1371/journal.pbio.1000234>  
1057 Foe, V. E. (1989). Mitotic domains reveal early commitment of cells in *Drosophila* embryos.  
1058 *Development*, *107*(1), 1-22. <https://www.ncbi.nlm.nih.gov/pubmed/2516798>  
1059 Fogarty, P., Campbell, S. D., Abu-Shumays, R., Phalle, B. S., Yu, K. R., Uy, G. L., Goldberg, M. L., &  
1060 Sullivan, W. (1997). The *Drosophila* grapes gene is related to checkpoint gene

- 1061 chk1/rad27 and is required for late syncytial division fidelity. *Curr Biol*, 7(6), 418-426.  
1062 [https://doi.org/10.1016/s0960-9822\(06\)00189-8](https://doi.org/10.1016/s0960-9822(06)00189-8)
- 1063 Fogarty, P., Kalpin, R. F., & Sullivan, W. (1994). The Drosophila maternal-effect mutation grapes  
1064 causes a metaphase arrest at nuclear cycle 13. *Development*, 120(8), 2131-2142.  
1065 <https://doi.org/10.1242/dev.120.8.2131>
- 1066 Ghelelovitch, S. (1952). [Genetic determinism of sterility in the cross-breeding of various strains  
1067 of *Culex autogenicus* Roubaud]. *C R Hebd Seances Acad Sci*, 234(24), 2386-2388.  
1068 <https://www.ncbi.nlm.nih.gov/pubmed/12979357> (Sur le determinisme genetique de la  
1069 sterilité dans les croisements entre différentes souches de *Culex autogenicus* Roubaud.)
- 1070 Hermant, C., Boivin, A., Teyssset, L., Delmarre, V., Asif-Laidin, A., van den Beek, M., Antoniewski,  
1071 C., & Ronsseray, S. (2015). Paramutation in *Drosophila* Requires Both Nuclear and  
1072 Cytoplasmic Actors of the piRNA Pathway and Induces Cis-spreading of piRNA  
1073 Production. *Genetics*, 201(4), 1381-1396. <https://doi.org/10.1534/genetics.115.180307>
- 1074 Hoffmann, A. A., Turelli, M., & Simmons, G. M. (1986). Unidirectional Incompatibility between  
1075 Populations of *Drosophila Simulans*. *Evolution*, 40(4), 692-701.  
1076 <https://doi.org/10.1111/j.1558-5646.1986.tb00531.x>
- 1077 Holtzman, S., Miller, D., Eisman, R., Kuwayama, H., Niimi, T., & Kaufman, T. (2010). Transgenic  
1078 tools for members of the genus *Drosophila* with sequenced genomes. *Fly (Austin)*, 4(4),  
1079 349-362. <https://doi.org/10.4161/fly.4.4.13304>
- 1080 Horard, B., Terretaz, K., Gosselin-Grenet, A. S., Sobry, H., Sicard, M., Landmann, F., & Loppin, B.  
1081 (2022). Paternal transmission of the *Wolbachia* CidB toxin underlies cytoplasmic  
1082 incompatibility. *Curr Biol*, 32(6), 1319-1331 e1315.  
1083 <https://doi.org/10.1016/j.cub.2022.01.052>
- 1084 Illmensee, K., & Mahowald, A. P. (1974). Transplantation of posterior polar plasm in *Drosophila*.  
1085 Induction of germ cells at the anterior pole of the egg. *Proc Natl Acad Sci U S A*, 71(4),  
1086 1016-1020. <https://doi.org/10.1073/pnas.71.4.1016>
- 1087 Jiggins, F. M. (2017). The spread of *Wolbachia* through mosquito populations. *PLoS Biol*, 15(6),  
1088 e2002780. <https://doi.org/10.1371/journal.pbio.2002780>
- 1089 Jost, E. (1970). [Genetic investigations on the incompatibility in the *Culex pipiens* complex].  
1090 *Theor Appl Genet*, 40(6), 251-256. <https://doi.org/10.1007/BF00282034> (Genetische  
1091 Untersuchungen zur Inkompatibilität im *Culex-pipiens*-Komplex.)
- 1092 Kaur, R., Leigh, B. A., Ritchie, I. T., & Bordenstein, S. R. (2022). The Cif proteins from *Wolbachia*  
1093 prophage WO modify sperm genome integrity to establish cytoplasmic incompatibility.  
1094 *PLoS Biol*, 20(5), e3001584. <https://doi.org/10.1371/journal.pbio.3001584>
- 1095 Kaur, R., Shropshire, J. D., Cross, K. L., Leigh, B., Mansueto, A. J., Stewart, V., Bordenstein, S. R.,  
1096 & Bordenstein, S. R. (2021). Living in the endosymbiotic world of *Wolbachia*: A  
1097 centennial review. *Cell Host Microbe*, 29(6), 879-893.  
1098 <https://doi.org/10.1016/j.chom.2021.03.006>
- 1099 Kidwell, M. G., Kidwell, J. F., & Sved, J. A. (1977). Hybrid Dysgenesis in *DROSOPHILA*  
1100 *MELANOGASTER*: A Syndrome of Aberrant Traits Including Mutation, Sterility and Male  
1101 Recombination. *Genetics*, 86(4), 813-833. <https://doi.org/10.1093/genetics/86.4.813>
- 1102 Klasson, L., Westberg, J., Sapountzis, P., Naslund, K., Lutnaes, Y., Darby, A. C., Veneti, Z., Chen,  
1103 L., Braig, H. R., Garrett, R., Bourtzis, K., & Andersson, S. G. (2009). The mosaic genome



- 1104 structure of the Wolbachia wRi strain infecting *Drosophila simulans*. *Proc Natl Acad Sci U*  
1105 *S A*, 106(14), 5725-5730. <https://doi.org/10.1073/pnas.0810753106>
- 1106 Landmann, F., Orsi, G. A., Loppin, B., & Sullivan, W. (2009). Wolbachia-mediated cytoplasmic  
1107 incompatibility is associated with impaired histone deposition in the male pronucleus.  
1108 *PLoS Pathog*, 5(3), e1000343. <https://doi.org/10.1371/journal.ppat.1000343>
- 1109 Lassy, C. W., & Karr, T. L. (1996). Cytological analysis of fertilization and early embryonic  
1110 development in incompatible crosses of *Drosophila simulans*. *Mech Dev*, 57(1), 47-58.  
1111 [https://doi.org/10.1016/0925-4773\(96\)00527-8](https://doi.org/10.1016/0925-4773(96)00527-8)
- 1112 Le Thomas, A., Rogers, A. K., Webster, A., Marinov, G. K., Liao, S. E., Perkins, E. M., Hur, J. K.,  
1113 Aravin, A. A., & Toth, K. F. (2013). Piwi induces piRNA-guided transcriptional silencing  
1114 and establishment of a repressive chromatin state. *Genes Dev*, 27(4), 390-399.  
1115 <https://doi.org/10.1101/gad.209841.112>
- 1116 LePage, D. P., Jernigan, K. K., & Bordenstein, S. R. (2014). The relative importance of DNA  
1117 methylation and Dnmt2-mediated epigenetic regulation on Wolbachia densities and  
1118 cytoplasmic incompatibility. *PeerJ*, 2, e678. <https://doi.org/10.7717/peerj.678>
- 1119 LePage, D. P., Metcalf, J. A., Bordenstein, S. R., On, J., Perlmutter, J. I., Shropshire, J. D., Layton,  
1120 E. M., Funkhouser-Jones, L. J., Beckmann, J. F., & Bordenstein, S. R. (2017). Prophage  
1121 WO genes recapitulate and enhance Wolbachia-induced cytoplasmic incompatibility.  
1122 *Nature*, 543(7644), 243-247. <https://doi.org/10.1038/nature21391>
- 1123 Li, X. Y., Harrison, M. M., Villalta, J. E., Kaplan, T., & Eisen, M. B. (2014). Establishment of regions  
1124 of genomic activity during the *Drosophila* maternal to zygotic transition. *Elife*, 3.  
1125 <https://doi.org/10.7554/eLife.03737>
- 1126 McClintock, B. (1941). The Stability of Broken Ends of Chromosomes in *Zea Mays*. *Genetics*,  
1127 26(2), 234-282. <https://doi.org/10.1093/genetics/26.2.234>
- 1128 Md, V., Misra, S., Li, H., & Aluru, S. (2019). Efficient Architecture-Aware Acceleration of BWA-  
1129 MEM for Multicore Systems. arXiv:1907.12931. Retrieved July 01, 2019, from  
1130 <https://ui.adsabs.harvard.edu/abs/2019arXiv190712931M>
- 1131 Megraw, T. L., Li, K., Kao, L. R., & Kaufman, T. C. (1999). The centrosomin protein is required for  
1132 centrosome assembly and function during cleavage in *Drosophila*. *Development*,  
1133 126(13), 2829-2839. <https://doi.org/10.1242/dev.126.13.2829>
- 1134 Momtaz, A. Z., Ahumada Sabagh, A. D., Gonzalez Amortegui, J. G., Salazar, S. A., Finessi, A.,  
1135 Hernandez, J., Christensen, S., & Serbus, L. R. (2020). A Role for Maternal Factors in  
1136 Suppressing Cytoplasmic Incompatibility. *Front Microbiol*, 11, 576844.  
1137 <https://doi.org/10.3389/fmicb.2020.576844>
- 1138 Moretti, R., Yen, P. S., Houe, V., Lampazzi, E., Desiderio, A., Failloux, A. B., & Calvitti, M. (2018).  
1139 Combining Wolbachia-induced sterility and virus protection to fight *Aedes albopictus*-  
1140 borne viruses. *PLoS Negl Trop Dis*, 12(7), e0006626.  
1141 <https://doi.org/10.1371/journal.pntd.0006626>
- 1142 Quinlan, A. R., & Hall, I. M. (2010). BEDTools: a flexible suite of utilities for comparing genomic  
1143 features. *Bioinformatics*, 26(6), 841-842. <https://doi.org/10.1093/bioinformatics/btq033>
- 1144 Reed, K. M., & Werren, J. H. (1995). Induction of paternal genome loss by the paternal-sex-ratio  
1145 chromosome and cytoplasmic incompatibility bacteria (Wolbachia): a comparative study  
1146 of early embryonic events. *Mol Reprod Dev*, 40(4), 408-418.  
1147 <https://doi.org/10.1002/mrd.1080400404>

- 1148 Riggs, B., Rothwell, W., Mische, S., Hickson, G. R., Matheson, J., Hays, T. S., Gould, G. W., &  
1149 Sullivan, W. (2003). Actin cytoskeleton remodeling during early *Drosophila* furrow  
1150 formation requires recycling endosomal components Nuclear-fallout and Rab11. *J Cell*  
1151 *Biol*, 163(1), 143-154. <https://doi.org/10.1083/jcb.200305115>
- 1152 Ryan, S. L., & Saul, G. B., 2nd. (1968). Post-fertilization effect of incompatibility factors in  
1153 *Mormoniella*. *Mol Gen Genet*, 103(1), 29-36. <https://doi.org/10.1007/BF00271154>
- 1154 Seller, C. A., Cho, C. Y., & O'Farrell, P. H. (2019). Rapid embryonic cell cycles defer the  
1155 establishment of heterochromatin by Eggless/SetDB1 in *Drosophila*. *Genes Dev*, 33(7-8),  
1156 403-417. <https://doi.org/10.1101/gad.321646.118>
- 1157 Seller, C. A., & O'Farrell, P. H. (2018). Rif1 prolongs the embryonic S phase at the *Drosophila*  
1158 mid-blastula transition. *PLoS Biol*, 16(5), e2005687.  
1159 <https://doi.org/10.1371/journal.pbio.2005687>
- 1160 Serbus, L. R., Casper-Lindley, C., Landmann, F., & Sullivan, W. (2008). The genetics and cell  
1161 biology of *Wolbachia*-host interactions. *Annu Rev Genet*, 42, 683-707.  
1162 <https://doi.org/10.1146/annurev.genet.41.110306.130354>
- 1163 Serbus, L. R., White, P. M., Silva, J. P., Rabe, A., Teixeira, L., Albertson, R., & Sullivan, W. (2015).  
1164 The impact of host diet on *Wolbachia* titer in *Drosophila*. *PLoS Pathog*, 11(3), e1004777.  
1165 <https://doi.org/10.1371/journal.ppat.1004777>
- 1166 Shropshire, J. D., Leigh, B., & Bordenstein, S. R. (2020). Symbiont-mediated cytoplasmic  
1167 incompatibility: what have we learned in 50 years? *Elife*, 9.  
1168 <https://doi.org/10.7554/eLife.61989>
- 1169 Sienski, G., Donertas, D., & Brennecke, J. (2012). Transcriptional silencing of transposons by Piwi  
1170 and maelstrom and its impact on chromatin state and gene expression. *Cell*, 151(5), 964-  
1171 980. <https://doi.org/10.1016/j.cell.2012.10.040>
- 1172 Sokac, A. M., Biel, N., & De Renzis, S. (2022). Membrane-actin interactions in morphogenesis:  
1173 Lessons learned from *Drosophila* cellularization. *Semin Cell Dev Biol*.  
1174 <https://doi.org/10.1016/j.semcd.2022.03.028>
- 1175 Sullivan, W., Ashburner, A., Hawley, R.S. (2000). *Drosophila Protocols*. Cold Spring Harbor  
1176 Laboratory Press.
- 1177 Sullivan, W., Daily, D. R., Fogarty, P., Yook, K. J., & Pimpinelli, S. (1993). Delays in anaphase  
1178 initiation occur in individual nuclei of the syncytial *Drosophila* embryo. *Mol Biol Cell*,  
1179 4(9), 885-896. <https://doi.org/10.1091/mbc.4.9.885>
- 1180 Sullivan, W., Minden, J. S., & Alberts, B. M. (1990). daughterless-*abo*-like, a *Drosophila*  
1181 maternal-effect mutation that exhibits abnormal centrosome separation during the late  
1182 blastoderm divisions. *Development*, 110(2), 311-323.  
1183 <https://doi.org/10.1242/dev.110.2.311>
- 1184 Sullivan, W., & Theurkauf, W. E. (1995). The cytoskeleton and morphogenesis of the early  
1185 *Drosophila* embryo. *Curr Opin Cell Biol*, 7(1), 18-22. [https://doi.org/10.1016/0955-0674\(95\)80040-9](https://doi.org/10.1016/0955-0674(95)80040-9)
- 1186
- 1187 Sun, G., Zhang, M., Chen, H., & Hochstrasser, M. (2022). The CinB Nuclease from *wNo*  
1188 *Wolbachia* Is Sufficient for Induction of Cytoplasmic Incompatibility in *Drosophila*. *mBio*,  
1189 e0317721. <https://doi.org/10.1128/mbio.03177-21>
- 1190 Tang, X., Cao, J., Zhang, L., Huang, Y., Zhang, Q., & Rong, Y. S. (2017). Maternal Haploid, a  
1191 Metalloprotease Enriched at the Largest Satellite Repeat and Essential for Genome

- 1192 Integrity in *Drosophila* Embryos. *Genetics*, 206(4), 1829-1839.  
1193 <https://doi.org/10.1534/genetics.117.200949>
- 1194 Teixeira, F. K., Okuniewska, M., Malone, C. D., Coux, R. X., Rio, D. C., & Lehmann, R. (2017).  
1195 piRNA-mediated regulation of transposon alternative splicing in the soma and germ line.  
1196 *Nature*, 552(7684), 268-272. <https://doi.org/10.1038/nature25018>
- 1197 Titen, S. W., & Golic, K. G. (2008). Telomere loss provokes multiple pathways to apoptosis and  
1198 produces genomic instability in *Drosophila melanogaster*. *Genetics*, 180(4), 1821-1832.  
1199 <https://doi.org/10.1534/genetics.108.093625>
- 1200 Tram, U., Fredrick, K., Werren, J. H., & Sullivan, W. (2006). Paternal chromosome segregation  
1201 during the first mitotic division determines Wolbachia-induced cytoplasmic  
1202 incompatibility phenotype. *J Cell Sci*, 119(Pt 17), 3655-3663.  
1203 <https://doi.org/10.1242/jcs.03095>
- 1204 Tram, U., & Sullivan, W. (2002). Role of delayed nuclear envelope breakdown and mitosis in  
1205 Wolbachia-induced cytoplasmic incompatibility. *Science*, 296(5570), 1124-1126.  
1206 <https://doi.org/10.1126/science.1070536>
- 1207 Turelli, M., & Hoffmann, A. A. (1991). Rapid spread of an inherited incompatibility factor in  
1208 California *Drosophila*. *Nature*, 353(6343), 440-442. <https://doi.org/10.1038/353440a0>
- 1209 Wang, H., Xiao, Y., Chen, X., Zhang, M., Sun, G., Wang, F., Wang, L., Zhang, H., Zhang, X., Yang,  
1210 X., Li, W., Wei, Y., Yao, D., Zhang, B., Li, J., Cui, W., Wang, F., Chen, C., Shen, W., Su, D.,  
1211 Bai, F., Huang, J., Ye, S., Zhang, L., Ji, X., Wang, W., Wang, Z., Hochstrasser, M., & Yang,  
1212 H. (2022). Crystal Structures of Wolbachia CidA and CidB Reveal Determinants of  
1213 Bacteria-induced Cytoplasmic Incompatibility and Rescue. *Nat Commun*, 13(1), 1608.  
1214 <https://doi.org/10.1038/s41467-022-29273-w>
- 1215 Weinert, L. A., Araujo-Jnr, E. V., Ahmed, M. Z., & Welch, J. J. (2015). The incidence of bacterial  
1216 endosymbionts in terrestrial arthropods. *Proc Biol Sci*, 282(1807), 20150249.  
1217 <https://doi.org/10.1098/rspb.2015.0249>
- 1218 Werren, J. H., Baldo, L., & Clark, M. E. (2008). Wolbachia: master manipulators of invertebrate  
1219 biology. *Nat Rev Microbiol*, 6(10), 741-751. <https://doi.org/10.1038/nrmicro1969>
- 1220 Wickham, H. (2016). *ggplot2: Elegant Graphics for Data Analysis*. In Springer-Verlag.  
1221 <https://ggplot2.tidyverse.org>
- 1222 Wright, J. D., & Barr, A. R. (1981). Wolbachia and the Normal and Incompatible Eggs of *Aedes*  
1223 *Polynesiensis* (Diptera, Culicidae). *Journal of Invertebrate Pathology*, 38(3), 409-418.  
1224 [https://doi.org/10.1016/0022-2011\(81\)90109-9](https://doi.org/10.1016/0022-2011(81)90109-9)
- 1225 Wu, X., Lindsey, A. R. I., Chatterjee, P., Werren, J. H., Stouthamer, R., & Yi, S. V. (2020). Distinct  
1226 epigenomic and transcriptomic modifications associated with Wolbachia-mediated  
1227 asexuality. *PLoS Pathog*, 16(3), e1008397.  
1228 <https://doi.org/10.1371/journal.ppat.1008397>
- 1229 Ye, Y. H., Woolfit, M., Huttley, G. A., Rances, E., Caragata, E. P., Popovici, J., O'Neill, S. L., &  
1230 McGraw, E. A. (2013). Infection with a Virulent Strain of Wolbachia Disrupts Genome  
1231 Wide-Patterns of Cytosine Methylation in the Mosquito *Aedes aegypti*. *PLoS One*, 8(6),  
1232 e66482. <https://doi.org/10.1371/journal.pone.0066482>
- 1233 Yen, J. H., & Barr, A. R. (1971). New hypothesis of the cause of cytoplasmic incompatibility in  
1234 *Culex pipiens* L. *Nature*, 232(5313), 657-658. <https://doi.org/10.1038/232657a0>

- 1235 Yuan, K., Seller, C. A., Shermoen, A. W., & O'Farrell, P. H. (2016). Timing the *Drosophila* Mid-  
1236 Blastula Transition: A Cell Cycle-Centered View. *Trends Genet*, 32(8), 496-507.  
1237 <https://doi.org/10.1016/j.tig.2016.05.006>
- 1238 Zheng, X., Zhang, D., Li, Y., Yang, C., Wu, Y., Liang, X., Liang, Y., Pan, X., Hu, L., Sun, Q., Wang, X.,  
1239 Wei, Y., Zhu, J., Qian, W., Yan, Z., Parker, A. G., Gilles, J. R. L., Bourtzis, K., Bouyer, J.,  
1240 Tang, M., Zheng, B., Yu, J., Liu, J., Zhuang, J., Hu, Z., Zhang, M., Gong, J. T., Hong, X. Y.,  
1241 Zhang, Z., Lin, L., Liu, Q., Hu, Z., Wu, Z., Baton, L. A., Hoffmann, A. A., & Xi, Z. (2019).  
1242 Incompatible and sterile insect techniques combined eliminate mosquitoes. *Nature*,  
1243 572(7767), 56-61. <https://doi.org/10.1038/s41586-019-1407-9>  
1244
